# Supplementary material
Source: HighWire-hosted journal article supplement (https://bmjopen.bmj.com/content/12/3/e056620)
Supplement: inline-supplementary-material-1 [file inline-supplementary-material-1.pdf]

**ASSESSING THE EFFECTIVENESS OF FAMILY-BASED APPROACHES AIMED AT PREVENTION AND SUSTAINABLE SELF-MANAGEMENT OF DISABILITIES, IMPACTING THE QUALITY OF LIFE, MENTAL WELLBEING AND PARTICIPATION OF PEOPLE WITH LEPROSY, PODOCONIOSIS AND OR LYMPHATIC FILARIASIS AND THEIR FAMILIES IN EAST AND WEST GOJJAM, ETHIOPIA.**

**BY - MOGES WUBIE (ASSIS. PROF.)**

**ALICE SCHIPPERS (PHD, PROF.)**

**ANNA VAN 'T NOORDENDE (PHD)**

**TESFAYE TADESS (MA)**

**MEGA RESEARCH PROJECT PROPOSAL**

**OCTOBER, 2020**

**DEBRE MARKOS, ETHIOPIA**

**Mega Research Project proposal**

|                                                                                                                                                                                                                                                                                                                                    |                                                      |                                                           |             |
|------------------------------------------------------------------------------------------------------------------------------------------------------------------------------------------------------------------------------------------------------------------------------------------------------------------------------------|------------------------------------------------------|-----------------------------------------------------------|-------------|
| <b>Title: Assessing the effectiveness of family-based approaches aimed at prevention and sustainable self-management of disabilities, impacting the quality of life, mental wellbeing and participation of people with leprosy, podoconiosis and or lymphatic filariasis and their families in East and West Gojjam, Ethiopia.</b> |                                                      |                                                           |             |
| Person(s) undertaking the project in order of contribution                                                                                                                                                                                                                                                                         |                                                      |                                                           |             |
| Name                                                                                                                                                                                                                                                                                                                               | Qualification<br>(Area of study & Degree)            | Institution/Company                                       | Country     |
| Moges Wubie                                                                                                                                                                                                                                                                                                                        | MSc, Assistant professor                             | Debre Markos University                                   | Ethiopia    |
| Alice Schippers                                                                                                                                                                                                                                                                                                                    | PhD                                                  | Disability Studies in Netherlands                         | Netherlands |
| Anna van 't Noordende                                                                                                                                                                                                                                                                                                              | PhD                                                  | NLR; and<br>Disability Studies in Netherlands             | Netherlands |
| Tesfaye Tadesse                                                                                                                                                                                                                                                                                                                    | MA                                                   | Ethiopian National People<br>Affected by Leprosy (ENAPAL) | Ethiopia    |
| Source of budget: Leprosy Research Initiative                                                                                                                                                                                                                                                                                      |                                                      | Total budget required: 203,209.00 €                       |             |
| Contact address of the PI: Tel. Address +251912076152, Email mogeswub@gmail.com                                                                                                                                                                                                                                                    |                                                      |                                                           |             |
| Contact address of first co-investigator: Tel. Address +316 19933345, Email alice.schippers@disabilitystudies.nl                                                                                                                                                                                                                   |                                                      |                                                           |             |
| Study period: 36 months                                                                                                                                                                                                                                                                                                            | Date of commencement: September<br>2020 –August 2023 | Date of completion: August<br>31/2023                     |             |
| Institution at which study to be conducted and address: (Debre Markos University, Debre Markos, Ethiopia)                                                                                                                                                                                                                          |                                                      |                                                           |             |

**Acknowledgments**

We would like to acknowledge Leprosy Research Initiative for funding this project. Our acknowledgement also Debre Markos University, College of Health Science giving Ethical clearance to conduct this research project.

## 2. TABLE OF CONTENTS

Table of contents

| Contents                                                  | Pages |
|-----------------------------------------------------------|-------|
| I. Acknowledgment .....                                   | II    |
| 1. Mega Project proposal.....                             | III   |
| 2. Table of contents.....                                 | IV    |
| 3. Abbreviations and acronyms .....                       | V     |
| 4. List of appendices .....                               | VI    |
| 5. Summary.....                                           | VII   |
| 6. Background and justification .....                     | 1     |
| Main research question.....                               | 4     |
| 7. Objective of the research project.....                 | 5     |
| 7.1. General Objective.....                               | 5     |
| 7.2.1. Primary Specific objectives.....                   | 5     |
| 7.2.2. Secondary Specific objectives.....                 | 5     |
| 8. Materials and methods.....                             | 5     |
| (1) Study design.....                                     | 5     |
| (2) Study population and participant characteristics..... | 6     |
| Eligibility criteria.....                                 | 7     |
| (3) Sample size .....                                     | 7     |
| (4) Primary and secondary endpoints .....                 | 7     |
| Outcome measures .....                                    | 8     |
| (5) Data collection .....                                 | 8     |
| Outcome evaluation .....                                  | 8     |
| Impact assessment .....                                   | 8     |
| Study process.....                                        | 9     |
| Participant recruitment / sampling procedure.....         | 10    |

|                                                                                         |    |
|-----------------------------------------------------------------------------------------|----|
| Data management and data analysis.....                                                  | 10 |
| 9. Strengths and limitation of the study.....                                           | 11 |
| Strengths .....                                                                         | 11 |
| Limitation .....                                                                        | 11 |
| 10. Communication and dissemination of study findings .....                             | 11 |
| 11. Ethical considerations and review process.....                                      | 11 |
| 12. Implementation of the project .....                                                 | 13 |
| 13. Cost of the project with complete budget breakdown .....                            | 14 |
| 14. Benefits of the study results .....                                                 | 15 |
| Target group(s) .....                                                                   | 15 |
| Expected impact .....                                                                   | 15 |
| 15. Facilities available for the study (major facilities) .....                         | 15 |
| 16. Authorship right .....                                                              | 17 |
| 17. Declaration of conflict of interest.....                                            | 17 |
| 18. References .....                                                                    | 18 |
| 19. Assumptions, risks and mitigation actions .....                                     | 20 |
| 20. Assurance of the principal investigator .....                                       | 20 |
| 21. Commitment for and signature of co-investigators .....                              | 20 |
| 22. Comment and concurrence of the responsible head for<br>principal investigator ..... |    |

### 3. ABBREVIATIONS AND ACCRONYMS

DMU – Debre Markos University

DPO - Disability of People Organization

ENAPAL - Ethiopian National People Affected by Leprosy

FQoL - Family quality of life

ILEP - International Federation of Anti-Leprosy Associations

LF – Lymphatic Filariasis

LRI - Leprosy Research Initiative

NLR – Netherlands Leprosy Relief.

NTDs - Neglected Tropical Diseases

PHQ-9- Patient Health Questionnaire

P-scale - Participation levels

RCT – Randomized Control Trials

SARI- Stigma Assessment and Reduction of Impact

TLMI - The Leprosy Mission International

**4. LIST OF APPENDICES**

|                                               |  |
|-----------------------------------------------|--|
| Informed Consent form .....                   |  |
| English Version .....                         |  |
| Family Quality of Life tool .....             |  |
| Stigma Assessment & Reduction of Impact ..... |  |
| Participation Scale .....                     |  |
| Patient health questionnaire- 9 (PHQ-9) ..... |  |
| Amharic Version.....                          |  |
| Family Quality of Life tool .....             |  |
| Stigma Assessment & Reduction of Impact ..... |  |
| Participation Scale .....                     |  |

## SUMMARY

**Background:** The family-based intervention had a positive impact on impairments and self-management of disabilities, family quality of life and on stigma. However, the short term outputs and impact of the approaches in a non-random sample of persons affected by leprosy, lymphatic filariasis and podoconiosis not shown the long term effectiveness of the approach. Effectiveness of the family-based approach cannot be studied in such a non-random sample and with a relatively short follow-up time. To date most prevention of disability effectiveness studies have been flawed by failing to use a randomized controlled design. This has resulted in a lack of evidence about the effectiveness of these interventions. To collect credible evidence for a new, family-based approach, the current study will use a randomized controlled design. A randomized controlled design is the most rigorous way of determining whether a cause-effect relation exists between intervention and outcome(s).

In this study a unique thing is participating the family throughout avoiding misunderstanding of the diseases, help to disability management as well as for socioeconomic empowerment. It is necessary to get the diseases affected person recover from their disability and performed activities without difficulty.

In this three-year study, we aim to assess the effectiveness, longer-term outcomes and sustainability of the family-based approach aimed at prevention and sustainable self-management of disabilities due to leprosy, lymphatic filariasis and podoconiosis, impacting the quality of life, mental wellbeing and participation of affected persons and their families in Ethiopia. The research question of this project is "how effective is the family-based approach aimed at prevention and sustainable self-management of disabilities due to leprosy, podoconiosis and lymphatic filariasis compared to usual practice and care?"

**Objective of the project:** The primary objective of this study is to assess the effectiveness of a family-based intervention in terms of physical outcomes related to prevention and self-management of disabilities due to leprosy, podoconiosis or LF and family quality of life and wellbeing compared to usual practice and care. Secondary objectives include: (1) to reduce the number of people who have an episode of depression, as measured with the Patient Health Questionnaire (PHQ-9); (2) to reduce the level of stigma as measured with the SARI stigma scale (SSS), in-depth interviews and focus group discussions; (3) to improve social participation as measured with the Participation Scale (P-scale); (4) to increase the number of people who have adequate knowledge of leprosy, LF and podoconiosis as measures with disease specific Knowledge Attitudes and Practices (KAP) measures; (5) to empower people economically as measured by monthly household income, monthly financial contribution to the self-help group and in-depth interviews.

**Methods and Materials:** This project will be conducted in East and West Gojjam Zone Amhara region, with randomized control Trial on 516 leprosy, podoconiosis and lymphatic filariasis affected persons and their family members. The project is interventional on disability management, awareness creation and socioeconomic empowerment. We used both qualitative and quantitative data. For qualitative data using open code, inductive coding and content analysis. Similar phrases with recurring themes will be coded in the software program MAXQDA and clustered together in tables, to identify connections. For quantitative data four tools used to collect data from the study population before and after intervention. Along with these

continuous follow up data of disability management also other intervention data. Quantitative data will be entered in a database created using Epi Info and exported to SPSS Version 25. Simple descriptive methods will be used to generate a demographic profile of the study sample. In addition, mean total scores of the measures used will be calculated per participant group. Stepwise multivariate regression with backward elimination will be done to examine what factors will have an independent effect on the outcomes. In addition, by using difference in difference (*Diff-in-diff*) model - used to compare before and after the family-based approach is implemented will be calculated using one sample and two sample independent t-test.

Outcome measures include:

- Physical impairment outcomes (for persons affected by leprosy: Eyes, Hands, Feet (EHF) score, total number of wounds present (wound count), and registration of infection; for persons affected by podoconiosis and LF: lymphedema grading, measuring the largest point of swelling below the knee circumference, registering the frequency of acute attacks, wound count, and registration of infection).
- Perceived, experienced and self-stigma among affected persons (SARI stigma scale)
- Family quality of life score (Beach Centre FQoL and in-depth interviews)
- Participation levels (P-scale)
- Mental wellbeing/depression levels (PHQ-9)
- Attitudes, disability management practices and acceptability of the family-based approach (observations and in-depth interviews).
- Economic empowerment (Monthly household income, monthly financial contribution to the self-help group, use of credit; in-depth interviews)
- Most significant change in the community (in-depth interviews and focus group discussions)

This research project has three phases, starting from the first phase fulfill the family-based intervention component, validating measuring tool, training workshop will accomplish, study participants will be identify and randomized and baseline data will be collected. During the implementation phase addressing the three intervention areas like awareness creation, disability management and socioeconomic empowerment accompanied with taking recording of the activities. Lastly, follow up and evaluation phase, the effectiveness, feasibility and acceptability of the approaches will be evaluated.

We will seek to employ and train persons affected as research assistants or at least those who have a family member affected by an NTD or with a disability. The Ethiopian applicant of the project will responsible to carry out the research aspect of this study.

**Work plan and Budget:** The study will be conducted from October 2020 to September 2023 (36 months) with 203, 209 Euro. The first group meeting is anticipated to be held on February 2022 (meetings will be held until September/October 2022).

## 6. BACKGROUND AND JUSTIFICATION

**Background:** Most impairments of persons affected by leprosy, lymphatic filariasis (LF) and podoconiosis, particularly secondary impairments such as wounds, swelling and contractures, are largely preventable. Relatively simple methods exist for self-management of impairments that can be practiced at home, without the need for a lot of medical supplies. Too often, however, these methods are not taught to patients with neuropathic limbs or lymphedema, or if taught, they are not consistently practiced. Many practices for prevention and self-management of disabilities are suitable for use across different skin-related Neglected Tropical Diseases (NTDs) such as leprosy, LF and podoconiosis (1). Leprosy, LF and podoconiosis-related impairments are major determinants of stigma and participation restrictions. Negative attitudes towards affected persons and community and internalized stigma negatively impacts on the mental wellbeing of affected persons (2).

An important tool to assess general well-being is quality of life (3-6). Several studies showed leprosy, LF and podoconiosis to have an impact on quality of life (7-12). In contrast, family quality of life has not received much attention, despite the crucial role of the family in most societies around the world. In addition, several studies have indicated that family support is a highly significant factor that affects adherence to self-care (13, 14).

Persons affected often experience pain and visible impairments due to their condition. Some participants are ashamed of their disease and/or feel inferior to those who are not affected. Persons affected and their family members are sometimes insulted by their community members. Divorce and difficulties in finding a spouse, also for family members, was not uncommon. Especially persons with younger children seem to lack social support. Many participants reported participation restrictions. Half of the study participants were unable to work because of the physical or social limitations they face. Financial problems and loss of livelihood were reported by almost all participants, this sometimes led to begging. Financial problems and stigma also prevented affected persons and their family members from attending school (15). Many of the reported problems relate to stigma and a lack of finances. Family-based approaches that emphasize social and economic aspects could improve individual and family quality of life.

Based on the result, persons affected had significantly higher family quality of life than family members. The family quality of life dimensions that were affected were the same for persons affected and family members, with the physical / material wellbeing and emotional wellbeing domains being affected most. The persons affected by leprosy, podoconiosis and LF included in this study experienced stigma. Persons affected by podoconiosis and LF experienced significantly more stigma. In addition, persons affected experienced activity limitations, mostly related to walking. Result not indicated association between family quality of life and stigma, or between family quality of life and activity limitations (already accepted finding for publication on Transactions of The Royal Society of Tropical Medicine and Hygiene journal), [Unpublished] and;

The result of the family-based intervention had a positive impact on impairments and self-management of disabilities, family quality of life and stigma (submitted article for PLOS Neglected Tropical Disease) [Unpublished].

These findings are supported by a recent literature review by van Heuvel (16), who reported that the economic impact of leprosy is significant. According to van Heuvel (2018), many families of persons affected suffer from a loss of income. In addition, both stigma and visible impairments contribute to high levels of unemployment among persons affected by leprosy (16). Van Heuvel (16) recommends socio-economic

rehabilitation, vocational education, self-care groups and stigma reduction to further reduce leprosy-related disability. Stigma reduction and socio-economic empowerment are also key factors identified (15). The short-term impact of the family-based approaches that are being implemented on a small scale in the project areas from March 2019 to September 2019 was assessed.

The previous LRI-funded project only studied the short term outputs and impact of the approaches in a non-random sample of persons affected by leprosy, LF and podoconiosis. Effectiveness of the family-based approach cannot be studied in a non-random sample and with a relatively short follow-up time. A non-random sample and repeat measurements, conducted over an adequate time span, are needed to understand the effectiveness of the intervention and the longer-term impact on quality of life, mental wellbeing and participation. This also allow, for studying the underlying processes involved in the success or failure of the intervention (17). The current project, therefore, use a randomized controlled design to study the effectiveness of the family-based approach, as this is the most rigorous way of determining whether a cause-effect relation exists between intervention and outcome(s). The ultimate aim of the proposed study is to gather solid evidence of the effectiveness of family-based approaches for prevention and self-management of disabilities due to leprosy, LF and podoconiosis.

#### **Scientific justification/rationale of the study:**

“The family based approach is new approach in Ethiopia except the exploratory study conducted in Awi zone previously.” Thus, the approach developed in the exploratory LRI-funded project consists of the following main components:

1. Awareness raising of leprosy, LF and podoconiosis among persons affected, their families and community members
2. Disability management: prevention and self-management of disabilities
3. Socio-economic empowerment

To collect credible evidence for such a new, family-based approach, a randomized controlled design will be used. To date most prevention of disability effectiveness studies have been flawed by failing to use a randomized controlled design. This has resulted in a lack of evidence about the effectiveness of for example self-care groups, nerve decompression surgery, treatment of ulcers with antibiotics and use of certain footwear. Van Veen and colleagues (18), who conducted a systematic literature review into the cost-effectiveness of prevention of disability interventions concluded that evidence for cost-effectiveness of interventions aimed at prevention of disabilities for leprosy is scarce. They are calling researchers to develop strategies aimed at affordable and sustainable prevention of disability interventions in developing countries. Demonstrating the effectiveness of prevention of disability interventions is a recommendation of several systematic literature reviews (1, 16, 18)

In addition to solid evidence about effectiveness, we recognize the importance of psychosocial outcomes such as quality of life outcomes as ultimate focus of services, supports and policy development (19). We will therefore also study the inputs, throughputs, outputs and outcomes of the family-based approach. The following descriptions have been adapted from Schippers, Zuna and Brown (19):

- **Inputs:** the ideas, resources, and capacities within systems, organizations, and families that are readily available to be worked with and used, for example resources;
- **Throughputs:** are practices or actions, what you do, for example certain choices made and followed;
- **Outputs:** are the results of action taken in throughputs. Because throughputs are dynamic, changing life situations, outputs are also subject to change over time. For example money earned from working;
- **Outcomes:** are the longer term impact on a person's or a family's life, they influence the person and family involved, their social networks and the broader society. For example life satisfaction.

In this study, we aimed to assess the effectiveness, longer-term outcomes and sustainability of the family-based approach aimed at prevention and sustainable self-management of disabilities, impacting the quality of life, mental wellbeing and participation of affected persons and their families in Ethiopia. This way, we will be able to report on (a) the effectiveness, including acceptability and feasibility, of the family-based approach; (b) the longer term impacts of the family-based approach on the person affected and their families on (family) quality of life, stigma, mental wellbeing and participation and (c) provide a summary of their quality of life and perceptions as well as a description of how they arrived at that summary.

We will use a randomized controlled design as this is considered to provide the most reliable evidence on the effectiveness of interventions. The randomly assigned control group will help reduce the likelihood that any benefits or risks during the study occur due to factors outside of the intervention.

This research project planned to implement in East and West Gojjam, Amhara region, Ethiopia. Thus the prevalence of the diseases with in these two zones varies based on the type of diseases. The distribution of disability even though not specifically supported by the study figure there are more than seven leprosy affected people registered associations with a member of 30 – 400 according to Ethiopian national association of people affected by leprosy (ENAPAL) (20), evidence got from International Orthodox Christian Charity (IOCC), non- governmental organization working on podoconiosis and based on their report in these two zones the prevalence of podoconiosis reaches 0 – 10 % (21). Whereas, the prevalence of lymphatic filariasis occurred in one Woreda based on Biruk K. et al, 2018 in East Gojjam, Enarg Enawga the prevalence of lymphedema caused by lymphatic filariasis and podoconiosis 72.1 in 10, 000 population and 2.6 hydrocele (22).

### **Main research question**

How effective is the family-based approach aimed at prevention and sustainable self-management of disabilities due to leprosy, podoconiosis and lymphatic filariasis compared to usual practice and care?

## **7. OBJECTIVE OF THE RESEARCH PROJECT**

### **7.1. General Objective**

The general objective of this study is to assess the effectiveness of a family-based intervention for in terms of physical outcomes related to prevention and self-management of disabilities due to leprosy, podoconiosis or LF and family quality of life and wellbeing compared to usual practice and care in East and West Gojjam, Ethiopia, 2021 -2023.

### **7.2.1. Primary Specific objectives (To determine the effectiveness of the family-based approach)**

(1) to reduce the number of people who have an episode of depression, as measured with the Patient Health Questionnaire (PHQ-9); (2) to reduce the level of stigma as measured with the SARI stigma scale (SSS), in-depth interviews and focus group discussions; (3) to improve social participation as measured with the Participation Scale (P-scale); (4) to increase the number of people who have adequate knowledge of leprosy, LF and podoconiosis as measures with disease specific Knowledge Attitudes and Practices (KAP) measures; (5) to empower people economically as measured by monthly household income, monthly financial contribution to the self-help group and in-depth interviews.

### **7.2.2. Secondary Specific objectives (To contribute to mutual learning and local capacity building)**

1. To train persons affected as research assistants and optimize capacity by combining experiential, practical and scientific knowledge
2. Support Ethiopian leprosy-related research by having an Ethiopian researcher.
3. To identify key elements or factors that increased the success of the approach.

## **8. MATERIALS AND METHODS**

### **(1) Study design**

The quantitative study will use a randomized controlled trial design. The randomization units will be endemic districts (woredas), in the East and West Gojjam zone, Ethiopia. The woredas will be determined at the beginning of the project.

### **Intervention**

The family-based approach developed in the exploratory LRI-funded project consists of the following four main components that will be implemented as family-based approach:

- Awareness raising of leprosy, LF and podoconiosis among persons affected, their family members and community members (= improving knowledge, reducing stigma).
- Disability management, prevention and self-management of disabilities (= prevention of disabilities, improving participation, reducing stigma). This will be done based on lymphedema management guideline (23) and
- Socio-economic empowerment (= improving the socio-economic situation) – encourage to establish association of disabled persons this may solve social concern besides the improvement of health status outcome. Giving hygiene materials including shoes and energy saving stoves during the implementation of intervention has economic importance.
- A psychosocial care component, that will be developed in the first few months of the project based on a literature review, will additionally be included (= improving participation, quality of life and mental wellbeing).

## **(2) Study population and participant characteristics**

The following groups of people will be included in the study:

- People affected by leprosy, LF and podoconiosis
- Family members of people affected by leprosy, LF and podoconiosis

People with leprosy-related impairments and people with LF or podoconiosis-related lymphedema will be included in this study. Of each person affected, at least one adult family member will be included as well.

### **Operational Definition**

Effectiveness in disability measured by physical impairment outcomes (for persons affected by leprosy: Eyes, Hands, Feet (EHF) score, total number of wounds present (wound count), and registration of infection; for persons affected by podoconiosis and LF: lymphedema grading, measuring the largest point of swelling below the knee circumference, registering the frequency of acute attacks, wound count, and registration of infection).

Effectiveness in related to mental wellbeing/depression levels measured by Patient health questionnaire (PHS-9) which contains 9 question with the maximum score of 27 and this described severe depression while low score no depression.

Effectiveness in related to family quality of life measured and indicated by tool based 25 items of questions and has five subscales and maximum score of 125 can be obtained, with higher scores denoting better family quality of life.

Effectiveness in related to participation levels measured by participation scale the tools contains 13 questions with the maximum score of 90 can be obtained with the higher score indicated as extreme restriction.

Effectiveness in related to perceived, experienced and self-stigma among affected persons measured by SARI stigma scale tool. The tool contains 21 questions, its sum score ranges from 0 to 63 – with higher scores denoting higher levels of stigma.

Community members are person at the heart of healthy communities. They include all who live, learn, work, play, and pray in communities with in local area.

Family members of people affected by leprosy, LF and podoconiosis mean people who have lived in the same household such as blood related sibling, child, parent or grandparent of affected person by leprosy, LF or podoconiosis living in the same household). Belong with this if a person not related by blood but living together with the affected person considered as also family members if not fulfill the first blood related criteria.

### **Eligibility criteria**

#### **Inclusion criteria:**

Both men and women affected by the three diseases affected persons have equal chance of selection or over the age of 15 will be included in the study. All men and women have leprosy, LF or podoconiosis-related

impairments and have to be eligible to participate in self-care activities. Besides these, one – one family member selected for the intervention group of the diseases affected persons whose age greater than or equal to 15 years. The focus is on skin and wound care of the lower limbs. All persons have to be residents of project areas of the study equal or more than six months.

### **(3) Sample size**

A total of 630 participants, consisting of 420 persons affected and 210 family members, will be included in the study. It is difficult to distinguish LF and podoconiosis based on clinical features under field conditions and the distinction between these conditions doesn't matter with regard to the outcomes of this study, therefore persons affected by both these conditions are treated as one group. There will be one intervention and one control group for persons affected by leprosy, and one for persons affected by LF or podoconiosis. Family members are only included in the intervention group. A total of 420 persons affected will be included: 210 persons affected by leprosy and 210 persons affected by LF or podoconiosis; for each disease there will be one intervention and one control group. In the intervention group, a total of 210 family members will also be included. The intervention group will consist of 105 persons affected by leprosy, 105 persons affected by LF or podoconiosis, and 210 family members. The control group will consist of 105 persons affected by leprosy and 105 persons affected by LF or podoconiosis. The sample size calculation is based on data from the proof-of-concept study [34]. In the proof-of-concept study, 43% of the participants had leg impairments (wounds, nodules, and/or infections) at intake. During the final assessment, the last session participants attended, the number of participants with leg impairments had dropped to 21%. A sample size calculation for two proportions (proportion 1: 43%; proportion 2: 21%) with a significance of 0.05 and a power of 90% would give a total sample size of 92 participants in each group. We expect that the loss to follow-up will be no more than 15% (we do not expect a higher loss to follow-up, as participants will be followed-up at home). Our sample size will therefore be 105 persons affected in each group. The kebeles have been selected in such a way that they are similar to each other, we therefore do not anticipate a cluster effect in the current outcomes. In addition, at least 15 persons affected by leprosy, 15 persons affected by LF or podoconiosis and 15 family members (half of them of persons affected by leprosy) will be interviewed in-depth for the most significant change, acceptability and impact assessment interviews. Data will be collected until data saturation has been reached.

### **(4) Primary and secondary endpoints.**

Qualitative outcomes of the intervention are

- Family quality of life
- Attitudes towards having a family member with leprosy, LF and podoconiosis-related disabilities
- Practices for prevention and self-management of disabilities
- Acceptability of family-based approach
- Practicability of the approach

### **Outcome measures**

- Physical impairment outcomes: impairment scores, wound count, wound condition, the stage or grade of affected limb, and frequency of acute attacks in people affected – this will be collected using the Eyes, Hands, Feet (EHF) score, lymphedema grading, by measuring the largest point of swelling below the knee circumference in cm using measuring tape, by (self-) registering the frequency of acute attacks in a notebook, and by observation.
- Perceived, experienced and self-stigma among affected persons, using the SARI Stigma Scale (SSS).
- Family quality of life score, using the Beach Centre Family Quality of Life scale (FQoL scale).
- Participation levels, using the Participation Scale (P-scale).
- Mental wellbeing/depression levels, using the Patient Health Questionnaire (PHQ-9)
- Economic empowerment (Monthly household income, monthly financial contribution to the self-help group, use of credit; in-depth interviews)
- Most significant change in the community (in-depth interviews and focus group discussions)

#### **(5) Data collection**

The following data collection methods will be used: assessment of physical impairment outcomes, standardized questionnaires and in-depth interviews. In addition, demographic data will be collected from each participant.

To assess the effectiveness of the intervention, the following evaluation methods will be used:

#### **• Outcome evaluation**

- (1) A baseline and follow-up study will be done before, a few months after and one year after the approaches have been implemented. This will consist of administration of instruments (SARI, Beach Centre FQoL, P-scale, PHQ-9 and KAP). We will assess the outcomes by comparing the results of the baseline and follow-up studies.
  - (2) By comparing the changes to the physical impairment outcomes (impairment scores, wound count, wound condition, the stage or grade of affected limb, and frequency of acute attacks in people affected) that will be assessed using the EHF score, lymphedema grading, swelling measurement, frequency of acute attacks and observation. Physical outcomes will be registered every month. The changes over time will be compared to see if there are any (significant) differences.
- **Impact assessment.** An impact assessment will be carried out to evaluate the change in the target population, persons affected, and their family members and, also their community members, which has been brought about by the interventions. This will be done by conducting in-depth interviews with people from the target population, including influential people in the communities.
  - **The Most Significant Change Technique (MSC):** in-depth interviews will be conducted with various stakeholders (persons affected, their family members and their community members) to collect 'significant change stories' - stories of significant changes caused by the family-based approaches.

- Acceptability study. In-depth interviews will be held with persons who participated in the intervention, to explore their acceptability of the intervention.

The PHQ-9 has already been validated for use in Ethiopia (24-26). The SARI stigma scale, Beach Centre FQoL and P-scale have not yet been validated. This will be done in the first months of the project by Master students from the VU University in Amsterdam or Ethiopian Master Students or Master holder professionals depending on the situation of the current COVID 19 pandemic and other factors, aiming at inclusion of 120 people per scale. The interview guide and questionnaires will all be pilot testing among a small sample of participants before use.

### **Study process**

The study consists of the following phases:

#### **(1) Phase 1: Preparatory phase.**

- In this phase, a literature review will be conducted to guide the development of the psychosocial support component that will be added to the family-based approach. In addition, students from the VU University or Ethiopian Master Students or Master holder professionals will cross-culturally validate the SARI stigma scale, Beach Centre FQoL and P-scale. A training workshop will be organized to train the team in research methods and family-based approaches. People affected by leprosy, podoconiosis or LF and their family members will be recruited. Baseline data will be collected and the results analyzed. The study areas will be randomized. Protocol will be evaluated, revised, and approved /verified it.

#### **(2) Phase 2: Implementation of the intervention.**

The family-based intervention consists of an essential care package that consists of the following three main components: (1) self-management of disabilities; (2) economic empowerment; and (3) psychosocial support. All components of the intervention are family-based and family focused. Although not mentioned as a separate component, awareness raising is an integral part of the intervention. The essential care package is described in more detail below:

- Training sessions/group meetings for self-management and prevention of disabilities. Based on the proof-of-concept study, at least five group meetings will be held in a location that is most convenient for the participants. These sessions will be delivered in group format (several families participate with one person affected and one family member present per family) to introduce the family-based methods for self-management and prevention of disabilities. In the first session basic training will be given to persons affected and their family members in using and giving psychosocial support, increasing prevention and self-management of disabilities skills, information on course and treatment of disease, identifying barriers and facilitators to self-care and creating strategies to overcome these barriers. In the following training sessions, the research assistants support and guide all participating families (repeating the basic training given in the first session) and are available to clarify questions. During these meetings, physical impairment outcomes will routinely (monthly) be collected. Family members are encouraged to help their affected family member with

self-care at home. (Each group will have approximately 20 participants, therefore, training for participants in the intervention group will not all be given at the same day/time).

- Formation of self-help groups for economic empowerment. The project will facilitate the formation of self-help groups of affected persons, their family members are encouraged to join group meetings. Each self-help groups will collect a small contribution fee from its participants, these fees are used to provide loans for the participants of the self-help groups (micro-finance). Self-help groups will also lobby for 'benefits', e.g. the use of land, from the government. In addition, each self-help group participant and at least one of their family members will receive (one) vocational training. Income generation is essential for sustainable self-management and prevention of disabilities: without income, self-care items such as Vaseline and shoes cannot be bought. Income generation will benefit the whole family.
- Psychosocial support will be part of the training sessions/group meetings for self-management and prevention of disabilities. Persons affected and their family members will be trained in using and giving psychosocial support.

The control group will receive treatment as usual. Participants in the control areas will receive the same basic training (one session) as the participants in the intervention group, but will have no family members present during the training. When the intervention group has their additional four meetings (at least five meetings will be held), the participants in the control group will receive usual practice and care. In addition, they will receive information about existing mechanisms for economic empowerment (such as "funeral saving groups" and other existing credit saving initiatives).

The intervention will take **eight months**.

### **(3) Phase 3: Follow-up and evaluation.**

In this phase, the effectiveness of the approaches will be evaluated. This will be done by collecting information for the outcome evaluation (see 'outcome evaluation') above, this information will be collected routinely (e.g. each month during the meetings), at baseline and one year after the intervention has been completed. Effectiveness will be determined based on data from the baseline, data collected at the final group meeting, and data collected one year after the intervention. In addition, interviews will be conducted to collect most significant change stories and to assess the impact qualitatively.

#### **Participant recruitment / sampling procedure and follow-up procedures**

All participants will be asked for consent before they are enrolled in the study. The kebeles will be randomly divided to implement either the family-based approach or usual practice and care (control group).

A list will be prepared with all patients (leprosy, LF or podoconiosis) living in the project areas, that are registered at the health center and that are eligible to participate in self-care activities.

Persons affected to be included in the study will be selected by stratified systematic sampling with a random start from a list of persons affected registered at the primary health care center. This is done by selecting the first person affected on the list at random (by lottery method), and then selecting every X<sup>th</sup> patient on the list, based on the total number needed.

Four separate lists will be created: two for persons affected by leprosy (one intervention and one control) and two for persons affected by LF or podoconiosis (one intervention and one control). The two intervention and two control areas will be randomly selected from four project area lists, by putting the district names in a cup or box and randomly drawing two names (the two intervention areas).

### **Data quality assurance**

The questionnaire used to assess the FQoL, stigma, participation restriction and Patient health Questionnaire prepared in English. From this only PHQ -9 already validated in Amharic. But the others three of the questionnaire not validated but written in English. So translated to Amharic and then back to English to maintain consistency. Then we have translated in to Amharic and validating that before use for the actual data. Rigorous training will be given for research assistants on the basic techniques of the data collection procedures.

### **Data management and data analysis**

Quantitative data will be coded and entered in a database created using Epi data version 3.0 and exported to SPSS Verssion 25.

Simple descriptive methods will be used to generate a demographic profile of the study sample. In addition, mean total scores of the measures used will be calculated per participant group. Stepwise multivariate regression with backward elimination will be done to examine what factors will have an independent effect on the outcomes. In addition, by using difference in difference (*Diff-in-diff*) model - used to compare before and after the family-based approach is implemented will be calculated using one sample and two sample independent t-test. Data analysis will be done in the software packages Epi Info and SPSS Statistics.

The recordings of the in-depth interviews and focus group discussions will transcribed, translated to English and analyzed using open code, inductive coding and content analysis. Similar phrases with recurring themes will be coded in the software program MAXQDA and clustered together in tables, to identify connections.

Confidentiality and anonymity of data is of utmost important and will be ensured in data collection, data storage, analysis and publication. Research assistants who will collect the data will be fully trained in proper data management, maintenance of confidentiality and ensuring privacy during data collection. Only data that have been fully anonymised will be shared with the Dutch research team. The project leader (lead applicant) of this study will take full responsibility for ensuring the appropriate storage and security of data.

Data will be kept for five years and will be destroyed after this timeframe when no longer required.

## **9. STRENGTHS AND LIMITATION OF THE STUDY**

### **STRENGTHS**

- ✓ Strong research design
- ✓ Follow up time interval longer

### **LIMITATION**

- ✓ **None for the time being**

## 10. COMMUNICATION AND DISSEMINATION OF STUDY FINDINGS

What is expected to be achieved (Concrete output/deliverables)?

- 1) An article on the validation of the SARI stigma scale in Ethiopia
- 2) An article on the validation of the Beach Centre FQoL scale in Ethiopia
- 3) An article on the validation of the P-scale in Ethiopia
- 4) An article on the baseline data collected (questionnaires)
- 5) An article about impact (qualitative data collected) and most significant change
- 6) An article on the effectiveness of the family-based approach
- 7) An article on the feasibility and acceptability of the family-based approach
- 8) Report on how to implement the family-based approach to be shared across the ILEP network.

Deliverables 1 to 7 will be published in peer-reviewed, open-access journals. Findings will also be presented at conferences (details of appropriate conferences will be explored later). A detailed report on how to implement the family-based approach that has been developed will be shared across the ILEP network. Updates on the project will be shared on Disability Studies in Nederland's website (<https://disabilitystudies.nl/>) and on the NLR website (<https://www.leprastichting.nl/> and <https://nlrinternational.org/>). We will explore possibilities of giving updates about the project in the ILEP newsletter.

Additionally, the copy of reports delivered to the Health Science College, and accessible on DMU website. The finding will be present in national conferences in Ethiopia.

## 11. ETHICAL CONSIDERATIONS AND REVIEW PROCESS

Ethical approval will be obtained from the Ethical review Committee of Health Science College, Debre Markos University. Supportive letter will be obtained from Amhara Public Health Institute before starting the research project. All participants will be fully informed about the nature and objective of the study and of confidentiality of the data prior to data collection. Signed written consent will be obtained from each participant prior to data collection. Assent will be obtained from their guardian if participants present between the ages of 15 – 17 years. Their data will be confidentially maintained throughout.

## **12. IMPLEMENTATION OF THE PROJECT**

|                                                                                             | YEAR 1 (April–Dec 2020) |               |               |               | YEAR 2 (Jan–Dec 2021) |               |               |               | YEAR 3 (Jan–Dec 2022) |               |               |               | YEAR 4 (Jan–March 2023) |               |               |               |
|---------------------------------------------------------------------------------------------|-------------------------|---------------|---------------|---------------|-----------------------|---------------|---------------|---------------|-----------------------|---------------|---------------|---------------|-------------------------|---------------|---------------|---------------|
| ACTIVITY                                                                                    | 01<br>-<br>03           | 04<br>-<br>06 | 07<br>-<br>09 | 10<br>-<br>12 | 13<br>-<br>15         | 16<br>-<br>18 | 19<br>-<br>21 | 22<br>-<br>24 | 25<br>-<br>27         | 28<br>-<br>30 | 31<br>-<br>33 | 34<br>-<br>36 | 37<br>-<br>39           | 40<br>-<br>42 | 43<br>-<br>45 | 46<br>-<br>48 |
| Finalize partnerships and identify suitable sites                                           |                         |               |               |               |                       |               |               |               |                       |               |               |               |                         |               |               |               |
| Finalize selection of districts                                                             |                         |               |               |               |                       |               |               |               |                       |               |               |               |                         |               |               |               |
| Apply for ethical approval                                                                  |                         |               |               |               |                       |               |               |               |                       |               |               |               |                         |               |               |               |
| Validate scales                                                                             |                         |               |               |               |                       |               |               |               |                       |               |               |               |                         |               |               |               |
| Recruitment of program manager                                                              |                         |               |               |               |                       |               |               |               |                       |               |               |               |                         |               |               |               |
| Prepare training materials and resources for the intervention, including literature review  |                         |               |               |               |                       |               |               |               |                       |               |               |               |                         |               |               |               |
| Recruitment and training research assistants                                                |                         |               |               |               |                       |               |               |               |                       |               |               |               |                         |               |               |               |
| Set up project management system and database                                               |                         |               |               |               |                       |               |               |               |                       |               |               |               |                         |               |               |               |
| Recruitment of participants                                                                 |                         |               |               |               |                       |               |               |               |                       |               |               |               |                         |               |               |               |
| Pilot and adjustment forms, procedures and interview guides                                 |                         |               |               |               |                       |               |               |               |                       |               |               |               |                         |               |               |               |
| Randomization                                                                               |                         |               |               |               |                       |               |               |               |                       |               |               |               |                         |               |               |               |
| Kick-off meeting                                                                            |                         |               |               |               |                       |               |               |               |                       |               |               |               |                         |               |               |               |
| Baseline measurements (mixed methods)                                                       |                         |               |               |               |                       |               |               |               |                       |               |               |               |                         |               |               |               |
| Implementation of intervention (eight months)                                               |                         |               |               |               |                       |               |               |               |                       |               |               |               |                         |               |               |               |
| International meeting and monitoring                                                        |                         |               |               |               |                       |               |               |               |                       |               |               |               |                         |               |               |               |
| Follow-up measurements (mixed methods) and acceptability study                              |                         |               |               |               |                       |               |               |               |                       |               |               |               |                         |               |               |               |
| One-year follow-up                                                                          |                         |               |               |               |                       |               |               |               |                       |               |               |               |                         |               |               |               |
| Visit of Ethiopian Researcher to the Netherlands to write his thesis (2-3 months per visit) |                         |               |               |               |                       |               |               |               |                       |               |               |               |                         |               |               |               |
| Analyze results, write reports / articles, disseminate findings                             |                         |               |               |               |                       |               |               |               |                       |               |               |               |                         |               |               |               |

**13. COST OF THE PROJECT WITH COMPLETE BUDGET BREAKDOWN**

|                         | Year 1      | Year 2      | Year 3      | Year 4      | Total        |
|-------------------------|-------------|-------------|-------------|-------------|--------------|
| Personnel National      | € 30,170.00 | € 49,824.00 | € 50,748.00 | € 10,098.00 | € 140,840.00 |
| Personnel International | € 2,520.00  | € 3,360.00  | € 3,360.00  | € 840.00    | € 10,080.00  |
| Travel                  | € 7,050.00  | € 9,550.00  | € 9,550.00  | € 3,450.00  | € 29,600.00  |
| Equipment               | € 1,440.00  | € -         | € -         | € -         | € 1,440.00   |
| Running costs           | € 603.00    | € 1,200.00  | € 870.00    | € 156.00    | € 2,829.00   |
| Other costs             | € 2,500.00  | € 7,170.00  | € 7,050.00  | € 1,700.00  | € 18,420.00  |
| Total                   | € 44,283.00 | € 71,104.00 | € 71,578.00 | € 16,244.00 | € 203,209.00 |

## 14. BENEFITS OF THE STUDY RESULTS

### Target group(s)

We expect that the study will have the following benefit on the target groups:

- Improved knowledge and skills about practices for prevention and self-management of disabilities; sustainable self-management and prevention of disabilities (disability management) within the family.
- Improvements in activity levels and social participation, less wounds and a lower lymphedema grade
- Improved individual and family quality of life and mental wellbeing. Improved self-confidence.
- Improved knowledge and attitudes (reduction of stigma) towards having a family member with leprosy, LF or podoconiosis-related disabilities.
- Socio-economic empowerment.

### Expected impact

As preliminary results indicate, by improving the health situation of the persons affected and including family members in self-care and the wider community in awareness raising, their quality of life and that of their family is positively impacted. This RCT is targeted at sustainable improvement of the lives of persons affected, aiming at sustainable outcomes from the family based approach that are replicable in other regions with NTDs. Implementation will be encouraged as well bottom-up as top-down. Via ENAPAL (lead applicant) other regional health care centers and NTD-groups will be informed. ENAPAL will also inform and lobby at national level and within their international connections.

The participation in the study of persons affected and their family members, involvement of research assistants that are familiar with leprosy, LF and podoconiosis, and the establishment of a Disability of People Organization (DPO) are essential ingredients for sustainable results, as we know from other studies with a participatory design.

The research community will profit from experience of the study in general and the validation of scales in Ethiopia specifically. This is moreover important because this project aims also at local capacity building by involvement of local research assistants and the researcher in DMU.

## 15. FACILITIES AVAILABLE FOR THE STUDY (MAJOR FACILITIES)

Main tasks and responsibilities of lead applicant, co-applicant and other partners

### Ethiopian National Association of People Affected by Leprosy (ENAPAL):

- Lead research team
- Hire the program manager and research assistants
- Partake in selection of people affected by leprosy

- Follow-up monitoring
- Networking with co-applicants and government
- Responsible for the training of field staffs
- Organizes review meetings
- Oversees project implementation
- Responsible for budget

**Debre Markos University / Researcher:**

- Assist in training of field staff, administer the ethical issue and scientific aspect of the project.
- Data collection
- Responsible for data analysis
- Partake in selection of persons affected by podoconiosis and LF
- Support organizing and participate in review meetings
- Support project implementation
- Writes articles on the findings

**The Leprosy Mission International (TLMI) Ethiopia:**

- Technical support in implementation of project
- Assist in training of field staff
- Follow-up monitoring

**Disability Studies in the Netherlands:**

- Support on family-based approaches and family quality of life
- Supervise VU Master Students (but currently this changed to be Debre Markos university Master students if feasible unless those concerned professionals from the college with the decision of management of Health Science College).
- Support in working with research partners through training and monitoring
- Facilitate training of field staff
- Support in development of psychosocial component of family-based approach
- Support in data analysis

**Leprosy Research initiative**

- Funding and receiving report.

**Study area local health institution**

- ✓ It is site to give health education, demonstration of practical exercise for the patients and their family members.

**16. AUTHORSHIP RIGHT**

- ✓ Researchers, Advisors and co Advisors have mandate about the publication of the finding.

**17. DECLARATION OF CONFLICT OF INTEREST**

- ✓ Funder has no conflict of interest about the publication.

## 18. REFERENCES

1. Jansen, B. (2017). Systematic review: skin and wound management interventions related to skin-neglected tropical diseases. Master thesis. Retrieved on May 14 2019 from <https://www.leprosyinformation.org/resource/systematic-review-skin-and-wound-management-interventions-related-skin-neglected-tropical?aresult=0>.
2. Tsutsumi, A., Izutsu, T., Islam, M. A., Amed, J. U., Nakahara, S., Takagi, F., & Wakai, S. (2004). Depressive status of leprosy patients in Bangladesh: association with self-perception of stigma. *Leprosy review*, 75(1), 57-66.
3. Engel, L., Bryan, S., Noonan, V. K., & Whitehurst, D. G. (2018). Using path analysis to investigate the relationships between standardized instruments that measure health-related quality of life, capability wellbeing and subjective wellbeing: An application in the context of spinal cord injury. *Social Science & Medicine*, 213, 154-164.
4. Turner, A. (2018). Quality of life, psychological wellbeing and distress in those with an intellectual disability (Doctoral dissertation, University of Sheffield).
5. Pătraș, L., Martínez-Tur, V., Estreder, Y., Gracia, E., Moliner, C., & Peiró, J. M. (2018). Organizational performance focused on users' quality of life: The role of service climate and "contribution-to-others" wellbeing beliefs. *Research in developmental disabilities*, 77, 114-123.
6. Tough, H., Brinkhof, M. W., Siegrist, J., & Fekete, C. (2018). The impact of loneliness and relationship quality on life satisfaction: A longitudinal dyadic analysis in persons with physical disabilities and their partners. *Journal of psychosomatic research*, 110, 61-67.
7. Borges-de-Oliveira, R., Rocha-Leite, C. I., Araujo-de-Freitas, L., Queiroz, D. A., Machado, P. R., & Quarantini, L. C. (2015). Perception of social exclusion, neuropathy, and quality of life among Hansen's disease patients. *The International Journal of Psychiatry in Medicine*, 49(3), 176-186.
8. Lustosa, A. A., Nogueira, L. T., Pedrosa, J. I. D. S., Teles, J. B. M., & Campelo, V. (2011). The impact of leprosy on health-related quality of life. *Revista da Sociedade Brasileira de Medicina Tropical*, 44(5), 621-626.
9. Morgan, P. A., Franks, P. J., & Moffatt, C. J. (2005). Health-related quality of life with lymphoedema: a review of the literature. *International Wound Journal*, 2(1), 47-62.
10. Mousley E, Deribe K, Tamiru A, Davey G (2013). The impact of podocniosis on quality of life in Northern Ethiopia. *Health and quality of life outcomes*, 11 (1).
11. Tsutsumi, A., Izutsu, T., Islam, A. M., Maksuda, A. N., Kato, H., & Wakai, S. (2007). The quality of life, mental health, and perceived stigma of leprosy patients in Bangladesh. *Social science & medicine*, 64(12), 2443-2453.
12. Santos, V. S., Oliveira, L. S., Castro, F. D., Gois-Santos, V. T., Lemos, L. M., do CO Ribeiro, M., ... & Gurgel, R. Q. (2015). Functional Activity Limitation and Quality of Life of Leprosy Cases in an Endemic Area in Northeastern Brazil. *PLoS Negl Trop Dis*, 9(7), e0003900.

13. Li, J., Mu, H., Ke, W., Bao, X., Wang, Y., Wang, Z. & Cross, H. (2008). The sustainability of self-care in two counties of Guizhou Province, Peoples' Republic of China. *Leprosy review*, 79(1), 110-117.
14. Grey, M., Knafl, K., & McCorkle, R. (2006). A framework for the study of self-and family management of chronic conditions. *Nursing outlook*, 54(5), 278-286.
15. van 't Noordende AT, Aychew MW, Schippers A (2020) The impact of leprosy, podoconiosis and lymphatic filariasis on family quality of life: A qualitative study in Northwest Ethiopia. *PLoS Negl Trop Dis* 14(3): e0008173. <https://doi.org/10.1371/journal.pntd.0008173>.
16. Van Heuvel (2018). The economic impact of leprosy: A systematic review. Master thesis. Retrieved on May 14 2019, from <https://www.leprosy-information.org/files/VANHEUVEL2018.pdf>
17. Hill, K. G., Woodward, D., Woelfel, T., Hawkins, J. D., & Green, S. (2016). Planning for long-term follow-up: Strategies learned from longitudinal studies. *Prevention Science*, 17(7), 806-818.
18. Van Veen, N. H., McNamee, P., Richardus, J. H., & Smith, W. C. S. (2009). Cost-effectiveness of interventions to prevent disability in leprosy: a systematic review. *PLoS One*, 4(2), e4548.
19. Schippers, A., Zuna, N., & Brown, I. (2015). A proposed framework for an integrated process of improving quality of life. *Journal of Policy and Practice in Intellectual Disabilities*, 12(3), 151-161.
20. Ethiopian National Association of People Affected Leprosy (ENAPAL) report.
21. International Orthodox Christian Charity (IOCC), Amhara regional Buereau delegate person report.
22. Kebede B, Martindale S, Mengistu B, Kebede B, Mengiste A, H/Kiros F, et al. (2018). Integrated morbidity mapping of lymphatic filariasis and podoconiosis cases in 20 co-endemic districts of Ethiopia. *PLoS Negl Trop Dis* 12(7): e0006491. <https://doi.org/10.1371/journal.pntd.0006491>.
23. MoH. Lymphatic filariasis and podoconiosis morbidity management and disability prevention guidelines. 2016. Addis Ababa.
24. Gelaye, B., Williams, M. A., Lemma, S., Deyessa, N., Bahretibeb, Y., Shibire, T. & Zhou, X. H. A. (2013). Validity of the patient health questionnaire-9 for depression screening and diagnosis in East Africa. *Psychiatry research*, 210(2), 653-661.
25. Hanlon, C., Medhin, G., Selamu, M., Breuer, E., Worku, B., Hailemariam, M. & Fekadu, A. (2015). Validity of brief screening questionnaires to detect depression in primary care in Ethiopia. *Journal of affective disorders*, 186, 32-39.
26. Woldetsenay, Y. K., Belachew, T., Tesfaye, M., Spielman, K., Biesalski, H. K., Kantelhardt, E. J., & Scherbaum, V. (2018). Validation of the Patient Health Questionnaire (PHQ-9) as a screening tool for depression in pregnant women: Afaan Oromo version. *PloS one*, 13(2), e0191782.

**19. ASSUMPTIONS, RISKS AND MITIGATION ACTIONS**

| <b>Risks</b>                                                                               | <b>Mitigation plan(s)</b>                                                                                           |
|--------------------------------------------------------------------------------------------|---------------------------------------------------------------------------------------------------------------------|
| Delays due to political unrest                                                             | Personnel used for the research are from the project areas (locals) so it is anticipated that the work can continue |
| Delays due to environmental problems e.g. severe drought, people may move to another place | May need to provide some food to sustain the participants                                                           |
| Unable to reach enough participants in time due to                                         | May need to select another district                                                                                 |

|                                                                                       |                                                                                                                                                                                                                                                                                                                                                                                                                                                                                                                                                                                                                                                                                                                                                                                                                 |
|---------------------------------------------------------------------------------------|-----------------------------------------------------------------------------------------------------------------------------------------------------------------------------------------------------------------------------------------------------------------------------------------------------------------------------------------------------------------------------------------------------------------------------------------------------------------------------------------------------------------------------------------------------------------------------------------------------------------------------------------------------------------------------------------------------------------------------------------------------------------------------------------------------------------|
| not meeting the selection criteria                                                    |                                                                                                                                                                                                                                                                                                                                                                                                                                                                                                                                                                                                                                                                                                                                                                                                                 |
| Delays due to administrative obstacles such as for example obtaining ethical approval | Expected duration for obtaining will be 2 months, so will start applying for it as soon as we get approval from the LRI (if we get approval from the LRI for this study).                                                                                                                                                                                                                                                                                                                                                                                                                                                                                                                                                                                                                                       |
| COVID 19 illness                                                                      | <p>In Ethiopia</p> <ul style="list-style-type: none"> <li>➤ Program manager if get illness roles of the person covered by program assistant.</li> <li>➤ Program assistant if get illness vice versa roles covered by program manager.</li> <li>➤ Country coordinator from ENAPAL roles covered a delegate from the same institution.</li> <li>➤ Research assistants (Data collectors) at the beginning will recruit enough number of employee which plan to be six so if they face illness others covers the role of the ill person.</li> </ul> <p>In Netherlands</p> <ul style="list-style-type: none"> <li>➤ Technical support: Director DSiN – delegate person in the organization handle the role</li> </ul> <p>Technical support: Researcher roles covered by technical supporter or director of DSiN.</p> |
| COVID 19 related mortality                                                            | <p>ENAPAL</p> <ul style="list-style-type: none"> <li>✓ ENAPAL will substitute country coordinator</li> </ul> <p>DMU</p> <ul style="list-style-type: none"> <li>✓ DMU, CHS will substitute country coordinator</li> </ul> <p>DSiN</p> <p>DSiN will substitute</p>                                                                                                                                                                                                                                                                                                                                                                                                                                                                                                                                                |
| If COVID 19 related problem challenges us to continue implementation                  | <ul style="list-style-type: none"> <li>✓ By discussing with the funder we interrupt for certain period of time with budget free.</li> </ul>                                                                                                                                                                                                                                                                                                                                                                                                                                                                                                                                                                                                                                                                     |

## 20. ASSURANCE OF THE PRINCIPAL INVESTIGATOR:

I the undersigned agree to accept responsibilities for:

- The scientific, ethical and technical conduct of the research project,

- Requesting amendment for ANY change on the protocol that might need to happen during execution of the project, and obtain written approval for the request from concerned ethical review committee, of DMU, HSC.
- Submitting progress report every year and technical report within six months during the implementation of the project, for DMU, HSC.
- Reporting any adverse event that might happen to the study participants, data collectors, supervisors and coordinators during investigation,
- Submitting scientific publications that emanate from the project within two months of publication, and

Name \_\_\_\_\_ Signature \_\_\_\_\_

Date \_\_\_\_\_

#### 21. COMMITMENT FOR AND SIGNATURE OF CO-INVESTIGATORS.

| Name                     | Specific Roles and Responsibilities | Signature |
|--------------------------|-------------------------------------|-----------|
| 1. Alice Schippers       | _____                               | _____     |
| 2. Anna van 't Noordende | _____                               | _____     |
| 3. Tesfaye Tadesse       | _____                               | _____     |

#### 22. COMMENT AND CONCURRENCE OF THE RESPONSIBLE HEAD FOR PRINCIPAL INVESTIGATOR

\_\_\_\_\_

\_\_\_\_\_

\_\_\_\_\_

\_\_\_\_\_

Name \_\_\_\_\_ Signature \_\_\_\_\_ Date \_\_\_\_\_

#### 23. APPENDICES (Cite all appendices in the body of the proposal; attach all appendices under this section).

##### Informed Consent Form

Title of the study: Assessing the effectiveness of family-based approaches aimed at prevention and sustainable self-management of disabilities, impacting the quality of life, mental wellbeing and participation

of people with leprosy, podoconiosis and lymphatic filariasis and their families in the East and West Gojjam, Ethiopia.

Investigator(s): Moges Wubie, Alice Schippers, Anna van't Noordende, Tesfaye Tadesse

Organization: Debre Markos University

Sponsor: Leprosy Research Initiative (LRI)

You are being invited to take part in this research because you **are person(s) affected by leprosy/podoconiosis/ lymphatic filariasis/ family member(s) of these individual(s)**.

There will be **a total of 630** individuals taking part in this research.

Before you decide, it is important for you to understand why the research is being done and what it will involve. Please read **by yourself/ anybody can read for you** through the following information carefully and feel free to ask if it is not clear or to discuss it with anyone you wish.

Please take time to decide whether or not you want to take part in this research. We would like to stress that taking part in this study is entirely voluntary (Box 1). If you decide not to participate in the study, you will receive treatment going to the nearby health institution or course(s) of treatment] (Box 2).

Box 1. Taking part in this research is voluntary

- ✓ You can refuse to take part in this study.
- ✓ You can withdraw your participation from the study at any time.

Box 2. Alternative procedure(s) or course(s) of treatment)

|                                                                                               |                                                                                                                                                                                                                                                                     |
|-----------------------------------------------------------------------------------------------|---------------------------------------------------------------------------------------------------------------------------------------------------------------------------------------------------------------------------------------------------------------------|
| - As any unhealthy person you have the right to access treatment from the health institution. | The advantage of taking treatment from the health institution is that you will get every time. Disadvantage of that may be the level of expertise in that health institution may not take especial training on the case. Payment for the treatment may be required. |
| - Get advice from the research groups what alternatives have to solve the problem             | Not call every time for follow up by researcher as well manage the case by themselves. Disadvantage not get consecutive advice from the researcher.                                                                                                                 |

Information related to the study

Most impairments of persons affected by leprosy, lymphatic filariasis (LF) and podoconiosis, particularly secondary impairments such as wounds, swelling and contractures, are largely preventable. Relatively simple methods exist for self-management of impairments that can be practiced at home, without the need for a lot of medical supplies. Too often, however, these methods are not taught to patients with neuropathic limbs or lymphedema, or if taught, they are not consistently practiced. But on the contrary, related to impairment many challenges faced persons affected by the diseases like stigma, activity restriction, encountered with economic deficit and the like. This negatively impacts on the mental wellbeing of affected persons. In fact, not only persons affected impacted by presence of disability but also the family members.

We found that many of the reported problems relate to stigma and a lack of finances. Family-based approaches that emphasize social and economic aspects could improve individual and family quality of life. The approach focuses on beyond the three pillars of the problem like; awareness raising of leprosy, LF and podoconiosis among persons affected, their families and community members. Disability management: prevention and self-management of disabilities and; Socio-economic empowerment of the affected persons as well the family members.

Box 3. The expected possible adverse effects of [the investigational drug/intervention]

- Based on the Ministry of Health and WHO and ILEP guideline the wound, contracture and lymphedema morbidity management there is no expected adverse effects.

The objective of this research is to assess the effectiveness of family-based approaches aimed at prevention and sustainable self-management of disabilities, impacting the quality of life, mental wellbeing and participation of people with leprosy, podoconiosis and lymphatic filariasis and their families in the East and West Gojjam, Ethiopia, 2021 -2023.

The current project will use a randomized controlled design to study the effectiveness of the family-based approach, as this is the most rigorous way of determining whether a cause-effect relation exists between intervention and outcome(s).

Box 4. Study design

The study will use a randomized controlled trial design.

The study will last around eight months in total. If you decide to take part in this study, you will be asked to follow the schedule shown in Box 5. You should ensure that you are

Available to comply with the schedule.

Box 5. Please see schedule of study above.

We have summarized the foreseeable risks and expected benefits arising from participation in the study in Box 6.

| Box 6. Foreseeable risks and expected benefits arising from participation in the study |                                                                                                                                                                                                                                                                                                                                                                                                                                                                                                                                                                                                                                                                                                                                                |
|----------------------------------------------------------------------------------------|------------------------------------------------------------------------------------------------------------------------------------------------------------------------------------------------------------------------------------------------------------------------------------------------------------------------------------------------------------------------------------------------------------------------------------------------------------------------------------------------------------------------------------------------------------------------------------------------------------------------------------------------------------------------------------------------------------------------------------------------|
| Foreseeable risks                                                                      | Expected benefits                                                                                                                                                                                                                                                                                                                                                                                                                                                                                                                                                                                                                                                                                                                              |
| - No any foreseeable risk                                                              | <p>We expect that the study will have the following benefit on the target groups:</p> <ul style="list-style-type: none"> <li>➤ Improved knowledge and skills about practices for prevention and self-management of disabilities; sustainable self-management and prevention of disabilities (disability management) within the family.</li> <li>➤ Improvements in activity levels and social participation, less wounds and a lower lymphedema grade</li> <li>➤ Improved individual and family quality of life and mental wellbeing.</li> <li>➤ Improved knowledge and attitudes (reduction of stigma) towards having a family member with leprosy, LF or podoconiosis-related disabilities.</li> <li>➤ Socio-economic empowerment.</li> </ul> |

Certain occurrences may take place during the course of the study. We have summarized these in Box 7 and described how to manage them.

| Box 7. Occurrences that may take place during the study period |                                                                                                                                                                                                                                                                        |
|----------------------------------------------------------------|------------------------------------------------------------------------------------------------------------------------------------------------------------------------------------------------------------------------------------------------------------------------|
| Occurrences                                                    | How to manage                                                                                                                                                                                                                                                          |
| Withdrawal of volunteers from the study                        | We consider and add 15% of the total sample for non-response rate at the beginning.                                                                                                                                                                                    |
| Availability of new information that may affect your decision  | We (the research group) discussed about the issue as well share the idea with the concerned ethical committee and will decide about that.                                                                                                                              |
| [Criteria for the termination of participation, if any]        | <ul style="list-style-type: none"> <li>➤ The selected individual interrupt the intervention and two follow up visits.</li> <li>➤ If the study participant has no interest to continue with the study.</li> <li>➤ If they want to change their living place.</li> </ul> |

- At the end of the study, you will improved knowledge and skills about practices for prevention and self-management of disabilities; sustainable self-management and prevention of disabilities

(disability management) within the family. Improvements in activity levels and social participation, less wounds and a lower lymphedema grade. Improved individual and family quality of life and mental wellbeing. Improved knowledge and attitudes (reduction of stigma) towards having a family member with leprosy, LF or podoconiosis-related disabilities. Additionally, there is also socio-economic empowerment of the study participants. Lastly a psychosocial care component, that will be developed in the first few months of the project based on a literature review, will additionally be included (= improving participation, quality of life and mental wellbeing).

All data collected from the study will be kept confidential. The project leader (lead applicant) and principal investigator of this study will take full responsibility for ensuring the appropriate storage and security of data. Presentations of the study's results at meetings/ conferences or their publication in a scientific journal will not include your name. However, the national authority for drug use, ethics committees and sponsor's representatives will have access to the data for verification.

As you are a participant of the study there is no any payment given to you but the necessary hygiene materials and some other important kind of directly or indirectly disability prevention things (energy saving stoves) will be given to you. In case of any injury or illness resulting directly from participation in the study, will entertain according to the legal law rule.

If you have any questions related to the study or you experience any adverse event before/during participation in the study, you can consult the contact persons listed in Box 8.

Box 8. The contact persons

1. Moges Wubie

Tel. +251912076152 E-mail: mogeswub@gmail.com

2. Tesfaye Tadesse (Ethiopian National people affected by Leprosy (ENAPAL)).

Tel. +251911440367 E-mail: tadesse.tesfaye@ymail.com

If you have any questions related to your rights, you can contact [name of the ethics committee and contact number].

Regarding to publication the funder no involved or decided.

|                                                                                                                                                                                                                                                                                                                                                                                                        |                                                                                                                                                                                                                                                                                                                                                                                                                  |
|--------------------------------------------------------------------------------------------------------------------------------------------------------------------------------------------------------------------------------------------------------------------------------------------------------------------------------------------------------------------------------------------------------|------------------------------------------------------------------------------------------------------------------------------------------------------------------------------------------------------------------------------------------------------------------------------------------------------------------------------------------------------------------------------------------------------------------|
| <p><b><u>Certificate of Consent</u></b><br/> I have read or somebody I trusted with read the foregoing information. I have an opportunity to ask questions and all my quest have been answered to my satisfaction. I voluntary consent to participate in this research study.</p> <p>_____</p> <p>Printed name of the participant</p> <p>_____</p> <p>Signature of the participant<br/> Date _____</p> | <p>I confirm that the participant was given an opportunity to ask questions about the study and all questions have been answered correctly. I confirm that the consent has been given voluntarily. A copy of this ICF has been provided to the participant.</p> <p>_____</p> <p>Printed name of the person taking the consent</p> <p>_____</p> <p>Signature of the person taking the consent<br/> Date _____</p> |
| <p><b><u>If illiterate</u></b><br/> I have witnessed the accurate reading of the <u>consent form to the potential participant, and the individual has had the opportunity to ask questions. I confirm that the individual has given consent freely.</u></p> <p>_____</p> <p>Printed name of the witness</p> <p>_____</p> <p>Signature of the witness<br/> Date _____</p>                               |                                                                                                                                                                                                                                                                                                                                                                                                                  |

## Beach Center Family Quality of Life Scale:

Code Number

|                                       |
|---------------------------------------|
| <b>FAMILY QUALITY OF LIFE (cont.)</b> |
|---------------------------------------|

| How satisfied am I that...                                                                          | <i>Very<br/>Dissatisfied</i> | <i>Dissatisfied</i>      | <i>Neither</i>           | <i>Satisfied</i>         | <i>Very<br/>Satisfied</i> |
|-----------------------------------------------------------------------------------------------------|------------------------------|--------------------------|--------------------------|--------------------------|---------------------------|
| 1. My family enjoys spending time together.                                                         | <input type="checkbox"/>     | <input type="checkbox"/> | <input type="checkbox"/> | <input type="checkbox"/> | <input type="checkbox"/>  |
| 2. My family members help the children learn to be independent.                                     | <input type="checkbox"/>     | <input type="checkbox"/> | <input type="checkbox"/> | <input type="checkbox"/> | <input type="checkbox"/>  |
| 3. My family has the support we need to relieve stress.                                             | <input type="checkbox"/>     | <input type="checkbox"/> | <input type="checkbox"/> | <input type="checkbox"/> | <input type="checkbox"/>  |
| 4. My family members have friends or others who provide support.                                    | <input type="checkbox"/>     | <input type="checkbox"/> | <input type="checkbox"/> | <input type="checkbox"/> | <input type="checkbox"/>  |
| 5. My family members help the children with schoolwork and activities.                              | <input type="checkbox"/>     | <input type="checkbox"/> | <input type="checkbox"/> | <input type="checkbox"/> | <input type="checkbox"/>  |
| 6. My family members have transportation to get to the places they need to be.                      | <input type="checkbox"/>     | <input type="checkbox"/> | <input type="checkbox"/> | <input type="checkbox"/> | <input type="checkbox"/>  |
| 7. My family members talk openly with each other.                                                   | <input type="checkbox"/>     | <input type="checkbox"/> | <input type="checkbox"/> | <input type="checkbox"/> | <input type="checkbox"/>  |
| 8. My family members teach the children how to get along with others.                               | <input type="checkbox"/>     | <input type="checkbox"/> | <input type="checkbox"/> | <input type="checkbox"/> | <input type="checkbox"/>  |
| 9. My family members have some time to pursue our own interests.                                    | <input type="checkbox"/>     | <input type="checkbox"/> | <input type="checkbox"/> | <input type="checkbox"/> | <input type="checkbox"/>  |
| 10. Our family solves problems together.                                                            | <input type="checkbox"/>     | <input type="checkbox"/> | <input type="checkbox"/> | <input type="checkbox"/> | <input type="checkbox"/>  |
| 11. My family members support each other to accomplish goals.                                       | <input type="checkbox"/>     | <input type="checkbox"/> | <input type="checkbox"/> | <input type="checkbox"/> | <input type="checkbox"/>  |
| 12. My family members show that they love and care for each other.                                  | <input type="checkbox"/>     | <input type="checkbox"/> | <input type="checkbox"/> | <input type="checkbox"/> | <input type="checkbox"/>  |
| 13. My family has outside help available to us to take care of special needs of all family members. | <input type="checkbox"/>     | <input type="checkbox"/> | <input type="checkbox"/> | <input type="checkbox"/> | <input type="checkbox"/>  |
| 14. Adults in our family teach the children to make good decisions.                                 | <input type="checkbox"/>     | <input type="checkbox"/> | <input type="checkbox"/> | <input type="checkbox"/> | <input type="checkbox"/>  |

## FAMILY QUALITY OF LIFE (cont.)

| How <u>satisfied</u> am I that...                                                                                                        | <i>Very<br/>Dissatisfied</i> | <i>Dissatisfied</i>      | <i>Neither</i>           | <i>Satisfied</i>         | <i>Very<br/>Satisfied</i> |
|------------------------------------------------------------------------------------------------------------------------------------------|------------------------------|--------------------------|--------------------------|--------------------------|---------------------------|
| 15. My family gets medical care when needed.                                                                                             | <input type="checkbox"/>     | <input type="checkbox"/> | <input type="checkbox"/> | <input type="checkbox"/> | <input type="checkbox"/>  |
| 16. My family has a way to take care of our expenses.                                                                                    | <input type="checkbox"/>     | <input type="checkbox"/> | <input type="checkbox"/> | <input type="checkbox"/> | <input type="checkbox"/>  |
| 17. Adults in my family know other people in the children's lives (friends, teachers, etc.).                                             | <input type="checkbox"/>     | <input type="checkbox"/> | <input type="checkbox"/> | <input type="checkbox"/> | <input type="checkbox"/>  |
| 18. My family is able to handle life's ups and downs.                                                                                    | <input type="checkbox"/>     | <input type="checkbox"/> | <input type="checkbox"/> | <input type="checkbox"/> | <input type="checkbox"/>  |
| 19. Adults in my family have time to take care of the individual needs of every child.                                                   | <input type="checkbox"/>     | <input type="checkbox"/> | <input type="checkbox"/> | <input type="checkbox"/> | <input type="checkbox"/>  |
| 20. My family gets dental care when needed.                                                                                              | <input type="checkbox"/>     | <input type="checkbox"/> | <input type="checkbox"/> | <input type="checkbox"/> | <input type="checkbox"/>  |
| 21. My family feels safe at home, work, school, and in our neighborhood.                                                                 | <input type="checkbox"/>     | <input type="checkbox"/> | <input type="checkbox"/> | <input type="checkbox"/> | <input type="checkbox"/>  |
| 22. My family member with a disability has support to accomplish goals at school or at workplace.                                        | <input type="checkbox"/>     | <input type="checkbox"/> | <input type="checkbox"/> | <input type="checkbox"/> | <input type="checkbox"/>  |
| 23. My family member with a disability has support to accomplish goals at home.                                                          | <input type="checkbox"/>     | <input type="checkbox"/> | <input type="checkbox"/> | <input type="checkbox"/> | <input type="checkbox"/>  |
| 24. My family member with a disability has support to make friends.                                                                      | <input type="checkbox"/>     | <input type="checkbox"/> | <input type="checkbox"/> | <input type="checkbox"/> | <input type="checkbox"/>  |
| 25. My family has good relationships with the service providers who provide services and support to our family member with a disability. | <input type="checkbox"/>     | <input type="checkbox"/> | <input type="checkbox"/> | <input type="checkbox"/> | <input type="checkbox"/>  |

Thank you! You have finished completing this survey. Please make sure you erase any extra marks and have answered all the questions.

Reference: Beach Center on Disability (2005), The Beach Center Family Quality of Life Scale. Beach Center, The University of Kansas, Lawrence, KS, in partnership with families, service providers and researchers.

The Stigma Assessment and Reduction of Impact (SARI) Stigma Scale: Code Number 

| SARI Stigma Scale v.1.1<br>(based on the Berger HIV stigma scale) |                                                                         | No              | Yes | Don't | Not | Believe | Always/Of | Sometime | Rarely/on | Score |
|-------------------------------------------------------------------|-------------------------------------------------------------------------|-----------------|-----|-------|-----|---------|-----------|----------|-----------|-------|
| <b>Experienced stigma</b>                                         |                                                                         |                 |     |       |     |         |           |          |           |       |
| 1a                                                                | Do some people who know you have                                        | 0               |     | 0     | 0   |         |           |          |           |       |
| b                                                                 | <i>(If yes) How often has this happened?</i>                            |                 |     |       |     |         | 3         | 2        | 1         |       |
| 2a                                                                | Do people you care about stop                                           | 0               |     | 0     | 0   |         |           |          |           |       |
| b                                                                 | <i>(If yes) How often has this happened?</i>                            |                 |     |       |     |         | 3         | 2        | 1         |       |
| 3a                                                                | Did you lose friends by telling them you                                | 0               |     | 0     | 0   |         |           |          |           |       |
| b                                                                 | <i>(If yes) How often has this happened?</i>                            |                 |     |       |     |         | 3         | 2        | 1         |       |
| 4a                                                                | Do people avoid touching you once they                                  | 0               |     | 0     | 0   |         |           |          |           |       |
| b                                                                 | <i>(If yes) How often has this happened?</i>                            |                 |     |       |     |         | 3         | 2        | 1         |       |
| 5a                                                                | Have people physically backed away from                                 | 0               |     | 0     | 0   |         |           |          |           |       |
| b                                                                 | <i>(If yes) How often has this happened?</i>                            |                 |     |       |     |         | 3         | 2        | 1         |       |
| 6a                                                                | Do people seem afraid of you once they                                  | 0               |     | 0     | 0   |         |           |          |           |       |
| b                                                                 | <i>(If yes) How often has this happened?</i>                            |                 |     |       |     |         | 3         | 2        | 1         |       |
| 7a                                                                | Do you feel set apart and isolated<br>from the community since learning | 0               |     | 0     | 0   |         |           |          |           |       |
| b                                                                 | <i>(If yes) How often has this happened?</i>                            |                 |     |       |     |         | 3         | 2        | 1         |       |
|                                                                   |                                                                         | <b>Subtotal</b> |     |       |     |         |           |          |           |       |
| <b>Disclosure concerns</b>                                        |                                                                         |                 |     |       |     |         |           |          |           |       |
| 8a                                                                | Are you careful who you tell that you have                              | 0               |     | 0     | 0   |         |           |          |           |       |
| b                                                                 | <i>(If yes) How often are you careful?</i>                              |                 |     |       |     |         | 3         | 2        | 1         |       |
| 9a                                                                | Do you feel the need to hide your leprosy                               | 0               |     | 0     | 0   |         |           |          |           |       |
| b                                                                 | <i>(If yes) How often do you feel the need to</i>                       |                 |     |       |     |         | 3         | 2        | 1         |       |
| 10a                                                               | Do you believe telling someone you have                                 | 0               |     | 0     | 0   |         |           |          |           |       |
| b                                                                 | <i>(If yes) How often do you believe it is risky?</i>                   |                 |     |       |     |         | 3         | 2        | 1         |       |
| 11a                                                               | Do you worry that people may judge you                                  | 0               |     | 0     | 0   |         |           |          |           |       |
| b                                                                 | <i>(If yes) How often do you worry about this?</i>                      |                 |     |       |     |         | 3         | 2        | 1         |       |
|                                                                   |                                                                         | <b>Subtotal</b> |     |       |     |         |           |          |           |       |

Reference: Dadun, Peters, M.H., van Brakel, W.H., Lusli, M., Zweekhorst, M.B.M., Damayanti, R., Bunders, J.F.G., Irwanto (in preparation). Cultural validation of a new instrument to measure leprosy-related stigma: the SARI Stigma Scale.

| <b>SARI Stigma Scale v.1.1</b><br><i>(based on the Berger HIV stigma scale)</i> |                                     | No                 | Yes | Don't | Not | Always/Of | Sometime | Rarely/on | Score |
|---------------------------------------------------------------------------------|-------------------------------------|--------------------|-----|-------|-----|-----------|----------|-----------|-------|
| <b>Internalised stigma</b>                                                      |                                     |                    |     |       |     |           |          |           |       |
| 12a                                                                             | Do you feel guilty because you      | 0                  |     | 0     | 0   |           |          |           |       |
| b                                                                               | <i>(If yes) How often has this</i>  |                    |     |       |     | 3         | 2        | 1         |       |
| 13a                                                                             | Do you feel you are not as          | 0                  |     | 0     | 0   |           |          |           |       |
| b                                                                               | <i>(If yes) How often has this</i>  |                    |     |       |     | 3         | 2        | 1         |       |
| 14a                                                                             | Are you embarrassed that            | 0                  |     | 0     | 0   |           |          |           |       |
| b                                                                               | <i>(If yes) How often has this</i>  |                    |     |       |     | 3         | 2        | 1         |       |
| 15a                                                                             | Does having (had) leprosy           | 0                  |     | 0     | 0   |           |          |           |       |
| b                                                                               | <i>(If yes) How often has this</i>  |                    |     |       |     | 3         | 2        | 1         |       |
| 16a                                                                             | Do you regret having told some      | 0                  |     | 0     | 0   |           |          |           |       |
| b                                                                               | <i>(If yes) How often has this</i>  |                    |     |       |     | 3         | 2        | 1         |       |
| 17a                                                                             | Does having (had) leprosy make      | 0                  |     | 0     | 0   |           |          |           |       |
| b                                                                               | <i>(If yes) How often has this</i>  |                    |     |       |     | 3         | 2        | 1         |       |
|                                                                                 |                                     | <b>Subtotal</b>    |     |       |     |           |          |           |       |
| <b>Anticipated stigma</b>                                                       |                                     |                    |     |       |     |           |          |           |       |
| 18a                                                                             | Do people affected by leprosy       | 0                  |     | 0     | 0   |           |          |           |       |
| b                                                                               | <i>(If yes) How often does this</i> |                    |     |       |     | 3         | 2        | 1         |       |
| 19a                                                                             | Are people affected by leprosy      | 0                  |     | 0     | 0   |           |          |           |       |
| b                                                                               | <i>(If yes) How often does this</i> |                    |     |       |     | 3         | 2        | 1         |       |
| 20a                                                                             | Do most people think that a         | 0                  |     | 0     | 0   |           |          |           |       |
| b                                                                               | <i>(If yes) How often does this</i> |                    |     |       |     | 3         | 2        | 1         |       |
| 21a                                                                             | Do most people feel                 | 0                  |     | 0     | 0   |           |          |           |       |
| b                                                                               | <i>(If yes) How often does this</i> |                    |     |       |     | 3         | 2        | 1         |       |
|                                                                                 |                                     | <b>Subtotal</b>    |     |       |     |           |          |           |       |
|                                                                                 |                                     | <b>Total score</b> |     |       |     |           |          |           |       |

Code Number 

| No | Participation Scale Short 1.0                                                                                                                                                             | Not specified, not |     |           |    |                                   | NO problem | Small | Medium | Large | SCORE |
|----|-------------------------------------------------------------------------------------------------------------------------------------------------------------------------------------------|--------------------|-----|-----------|----|-----------------------------------|------------|-------|--------|-------|-------|
|    |                                                                                                                                                                                           |                    | Yes | Sometimes | No | Irrelevant, I don't want to don't |            |       |        |       |       |
| 1  | Do you have equal opportunity as your peers to find work?<br><i>[if sometimes or no] How big a problem is it to you?</i>                                                                  |                    | 0   |           |    | 0                                 |            |       |        |       |       |
|    |                                                                                                                                                                                           |                    |     |           |    |                                   | 1          | 2     | 3      | 5     |       |
| 2  | Do you work as hard as your peers do? (same hours, type of<br><i>[if sometimes or no] How big a problem is it to you?</i>                                                                 |                    | 0   |           |    | 0                                 |            |       |        |       |       |
|    |                                                                                                                                                                                           |                    |     |           |    |                                   | 1          | 2     | 3      | 5     |       |
| 3  | Do you contribute to the household economically in a similar<br><i>[if sometimes or no] How big a problem is it to you?</i>                                                               |                    | 0   |           |    | 0                                 |            |       |        |       |       |
|    |                                                                                                                                                                                           |                    |     |           |    |                                   | 1          | 2     | 3      | 5     |       |
| 4  | Do you make visits outside your village / neighbourhood as<br>much as your peers do? (except for treatment) e.g. bazaars.<br><i>[if sometimes or no] How big a problem is it to you?</i>  |                    | 0   |           |    | 0                                 |            |       |        |       |       |
|    |                                                                                                                                                                                           |                    |     |           |    |                                   | 1          | 2     | 3      | 5     |       |
| 5  | Do you take part in major festivals and rituals as your<br>peers do? (e.g. weddings, funerals, religious festivals)<br><i>[if sometimes or no] How big a problem is it to you?</i>        |                    | 0   |           |    | 0                                 |            |       |        |       |       |
|    |                                                                                                                                                                                           |                    |     |           |    |                                   | 1          | 2     | 3      | 5     |       |
| 6  | Do you take part in social activities as much your peers do?<br>(e.g. in sports, chat, meetings, religious or community<br><i>[if sometimes or no] How big a problem is it to you?</i>    |                    | 0   |           |    | 0                                 |            |       |        |       |       |
|    |                                                                                                                                                                                           |                    |     |           |    |                                   | 1          | 2     | 3      | 5     |       |
| 7  | Do you have the same respect in the community as your<br><i>[if sometimes or no] How big a problem is it to you?</i>                                                                      |                    | 0   |           |    | 0                                 |            |       |        |       |       |
|    |                                                                                                                                                                                           |                    |     |           |    |                                   | 1          | 2     | 3      | 5     |       |
| 8  | Do you visit other people in the community as often as other<br><i>[if sometimes or no] How big a problem is it for you?</i>                                                              |                    | 0   |           |    | 0                                 |            |       |        |       |       |
|    |                                                                                                                                                                                           |                    |     |           |    |                                   | 1          | 2     | 3      | 5     |       |
| 9  | Do you move around inside and outside the house and<br>around the village / neighbourhood just as other people do?<br><i>[if sometimes or no] How big a problem is it to you?</i>         |                    | 0   |           |    | 0                                 |            |       |        |       |       |
|    |                                                                                                                                                                                           |                    |     |           |    |                                   | 1          | 2     | 3      | 5     |       |
| 10 | In your village / neighbourhood, do you visit public places as<br>often as other people do? (e.g. schools, shops, offices,<br><i>[if sometimes or no] How big a problem is it to you?</i> |                    | 0   |           |    | 0                                 |            |       |        |       |       |
|    |                                                                                                                                                                                           |                    |     |           |    |                                   | 1          | 2     | 3      | 5     |       |
| 11 | In your home, do you do household work?<br><i>[if sometimes or no] How big a problem is it to you?</i>                                                                                    |                    | 0   |           |    | 0                                 |            |       |        |       |       |
|    |                                                                                                                                                                                           |                    |     |           |    |                                   | 1          | 2     | 3      | 5     |       |

| No | Participation Scale Short 1.0                               | Not specified, | Sometime |           |    | Irrelevant, I don't | Problem    |       |        |       | SCORE |
|----|-------------------------------------------------------------|----------------|----------|-----------|----|---------------------|------------|-------|--------|-------|-------|
|    |                                                             |                | Yes      | Sometimes | No |                     | NO problem | Small | Medium | Large |       |
| 1  | In family discussions, does your opinion count?             |                | 0        |           |    | 0                   |            |       |        |       |       |
|    | <i>[if sometimes or no]</i> How big a problem is it to you? |                |          |           |    |                     | 1          | 2     | 3      | 5     |       |
| 1  | Are you comfortable meeting new people?                     |                | 0        |           |    | 0                   |            |       |        |       |       |
|    | <i>[if sometimes or no]</i> How big a problem is it to you? |                |          |           |    |                     | 1          | 2     | 3      | 5     |       |

Comment:

|              |
|--------------|
| <b>TOTAL</b> |
|--------------|

Name: \_\_\_\_\_

Age: \_\_\_\_\_

Gender: \_\_\_\_\_

Interviewer: \_\_\_\_\_

Date of interview: \_\_\_\_/\_\_\_\_/\_\_\_\_

**Grades of participation restriction**

| No significant restriction | Mild restriction | Moderate restriction | Severe restriction | Extreme restriction |
|----------------------------|------------------|----------------------|--------------------|---------------------|
| 0 – 12                     | 13 – 22          | 23 – 32              | 33 – 52            | 53 – 90             |

Disclaimer: The Participation Scale is the intellectual property of the Participation Scale Development Team. Neither the Team or its sponsors can be held responsible for any consequences of the use of the Participation Scale.

Code Number

## PATIENT HEALTH QUESTIONNAIRE- 9 (PHQ-9)

Over the last 2 weeks, how often have you been bothered by any of the following problems?

(Use "✓" to indicate your answer)

all

|                                                                                                                                                                                      | Not at<br>all | Severa<br>l<br>days | More<br>than<br>half the<br>days | Nearl<br>y<br>ever<br>y<br>day |
|--------------------------------------------------------------------------------------------------------------------------------------------------------------------------------------|---------------|---------------------|----------------------------------|--------------------------------|
| 1. Little interest or pleasure in doing things                                                                                                                                       | 0             | 1                   | 2                                | 3                              |
| 2. Feeling down, depressed, or hopeless                                                                                                                                              | 0             | 1                   | 2                                | 3                              |
| 3. Trouble falling or staying asleep, or sleeping too much                                                                                                                           | 0             | 1                   | 2                                | 3                              |
| 4. Feeling tired or having little energy                                                                                                                                             | 0             | 1                   | 2                                | 3                              |
| 5. Poor appetite or overeating                                                                                                                                                       | 0             | 1                   | 2                                | 3                              |
| 6. Feeling bad about yourself — or that you are a failure or<br>have let yourself or your family down                                                                                | 0             | 1                   | 2                                | 3                              |
| 7. Trouble concentrating on things, such as reading the<br>newspaper or watching television                                                                                          | 0             | 1                   | 2                                | 3                              |
| 8. Moving or speaking so slowly that other people could<br>have noticed? Or the opposite — being so fidgety or<br>restless that you have been moving around a lot more<br>than usual | 0             | 1                   | 2                                | 3                              |
| 9. Thoughts that you would be better off dead or of hurting<br>yourself in some way                                                                                                  | 0             | 1                   | 2                                | 3                              |
| <b>FOR OFFICE CODING</b>                                                                                                                                                             | 0             | +                   | +                                | +                              |

=Total Score: \_\_\_\_ If you checked off any problems, how difficult have these problems made it for you to do your work, take care of things at home, or get along with other people?

Not  
difficult at  
all

Somewhat  
difficult

Very  
difficul  
t

Extremely  
difficult

Developed by Drs. Robert L. Spitzer, Janet B.W. Williams, Kurt Kroenke and colleagues, with an educational grant from Pfizer Inc. No permission required to reproduce, translate, display or distribute. <https://patient.info/do> or/patient-health-questionnaire-phq-9

በደብረ ሚዛን ዩኒቨርሲቲና በኢትዮጵያ የቆዳ በሽታ ተ/ማህበር በዚገ ምወረዳ በእግር እብጠትና የቆዳ በሽታ ተጠቂዎችን ለማጥናት የጥናት ተሳታፊዎች ማከታተያ ቅፅ

| ተ.ቁ | ስም ከእነ አባት | ፆታ | እድሜ | የቤተሰብ ብዛት | የት/ት ደረጃ | ስራ | የበሽታ ሁኔታ | ከበሽታው ጋር ምን ያህል ጊዜ ቆይቶ | አድራሻ |
|-----|------------|----|-----|-----------|----------|----|----------|------------------------|------|
| 1   |            |    |     |           |          |    |          |                        |      |
| 2   |            |    |     |           |          |    |          |                        |      |
| 3   |            |    |     |           |          |    |          |                        |      |
| 4   |            |    |     |           |          |    |          |                        |      |
| 5   |            |    |     |           |          |    |          |                        |      |
| 6   |            |    |     |           |          |    |          |                        |      |
| 7   |            |    |     |           |          |    |          |                        |      |
| 8   |            |    |     |           |          |    |          |                        |      |
| 9   |            |    |     |           |          |    |          |                        |      |
| 10  |            |    |     |           |          |    |          |                        |      |
| 11  |            |    |     |           |          |    |          |                        |      |
| 12  |            |    |     |           |          |    |          |                        |      |
| 13  |            |    |     |           |          |    |          |                        |      |
| 14  |            |    |     |           |          |    |          |                        |      |
| 15  |            |    |     |           |          |    |          |                        |      |
| 16  |            |    |     |           |          |    |          |                        |      |
| 17  |            |    |     |           |          |    |          |                        |      |
| 18  |            |    |     |           |          |    |          |                        |      |
| 19  |            |    |     |           |          |    |          |                        |      |
| 20  |            |    |     |           |          |    |          |                        |      |
| 21  |            |    |     |           |          |    |          |                        |      |
| 22  |            |    |     |           |          |    |          |                        |      |
| 23  |            |    |     |           |          |    |          |                        |      |

|    |  |  |  |  |  |  |  |  |  |
|----|--|--|--|--|--|--|--|--|--|
| 24 |  |  |  |  |  |  |  |  |  |
| 25 |  |  |  |  |  |  |  |  |  |
| 26 |  |  |  |  |  |  |  |  |  |
| 27 |  |  |  |  |  |  |  |  |  |
| 28 |  |  |  |  |  |  |  |  |  |
| 29 |  |  |  |  |  |  |  |  |  |

የ ሚኒ ጃ ስብሰባ ቢጠቅም ስም \_\_\_\_\_ ፊርማ \_\_\_\_\_

ሚጃ የተነገረበት ስምምነት ቅጽ

የጥናቱ ርዕስ-የአካል ጉዳትን ለመከላከል እና ዘላቂ የራስ-አያያዝን ለመቆጣጠር ያተኮሩ በቤተሰብ ላይ የተመሰረተ አቀራረቦችን ወጥታማ ትመግ ምን ምን፣ የኑሮ ጥራት ላይ ተጽዕኖ ማሳደር፣ የአእምሮ ጤንነት እና የሥራ ደረጃ በሽታ፣ ፖዴኮኒስስ እና ሊምፋቲክ ፊላሪያስ ያሉ ሰዎች እና ቤተሰቦቻቸው በምስራቅ እና ምዕራብ ጎጃም፣ ኢትዮጵያ ፡ ፡

ሚጃ (ዎቹ) ማስ ወቢ ፣ አሊስ ስቲፐር ፣ አና ሻንት ኑርደንድ ፣ ተስፋዬ ታደሰ

አደረጃጀት -ደብረ ሚርቆስ ዩኒቨርሲቲ

የገንዘብ ብድጋዎች የሚደረግ -የሥራ ደረጃ ምርምር ኢኒሽቲትዩቭ (ኤል አር አይ)

የዚህ ጥናት ተከፋይ እንዲሆኑ ተጋብዞ ዋል ምክንያቱም እርሶዎ የሥራ ደረጃ / ፖዴኮኒስስ / የሊምፋቲክ ፊላሪያስ ተጎጂ / የቤተሰብ አባል / በሚሆነዎት ፡ ፡

በዚህ ጥናት ውስጥ በአጠቃላይ 516 ግለሰቦች ይሳተፋሉ፡፡

ከመወሰን ወይንም በፊት ጥናቱ ለምን እየተካሄደ እንደሆነ እና ምን እንደሚከተት ማን ያዘቡ ለእርስዎ

አስፈላጊ ነው ፡ እባክዎን እራስዎ ያንብቡ/ማንኛውም ሰው የሚተላለፉትን ሚጃዎች በጥንቃቄ

ሊያነብልዎ ይችላል እና ግልፅ ካልሆነ ለማሰብ ቅድመ ምክንያቶች ለመደብዳት ለመደብዳት ነፃነት

ይሰጣቸዎት ፡ ፡

እባክዎን በዚህ ምርምር ውስጥ መሳተፍ ይፈልጉ ወይም አይፈልጉም ማለትን ለመወሰን ጊዜ ይወስኑ ፡ ፡

በዚህ ጥናት ውስጥ መሳተፍ ማለት በፈቃደኝነት መሆኑን ለማሳሰብ እንፈልጋለን (ሣጥን 1) ፡ ፡

በጥናቱ ውስጥ ላለ መሳተፍ ከወሰኑ በአቅራቢያዎ ወደ ማንኛውም ጠፍ ተቋም ወይም ወደ ሕክምና (አካሄድ)

ሕክምና የሚደረግ ሕክምና ያገኛሉ (ሣጥን 2)፡፡

ሣጥን 1. በዚህ ምርምር መሳተፍ በፈቃደኝነት ነው  
✓ በዚህ ጥናት ውስጥ አለመሳተፍ ይችላሉ ፡ ፡  
✓ በማንኛውም ጊዜ ከጥናቱ መወጣት/ማቋረጥ ይችላሉ ፡ ፡

|                                                         |                                                                                                                                                                                        |
|---------------------------------------------------------|----------------------------------------------------------------------------------------------------------------------------------------------------------------------------------------|
| ሣጥን 2. ተለዋጭ አሠራር ሂደት (ቶች) ወይም ሕክምና ውሳኔ አካሄድ)            |                                                                                                                                                                                        |
| - እንደ ማንኛውም ጠፍ ማያልሆነ ሰው ከጠፍ ተቋም ሕክምና የመገኘት መባት አለዎት ፡ ፡ | ህክምናን ከጠፍ ተቋም መወሰን ውስጥ መሳተፍ ማንኛውም ጊዜ ህክምና ያገኛሉ ማለት ነው ፡ ፡<br>በዚያ ያለ ጉድለት ምን አልባት በጠፍ ተቋም ውስጥ ያለው ባለሙያ የሚደረግ ሊሆን ይችላል በጉዳዩ ላይ ልዩ ሥልጠና ያልወሰደ ሊሆን ይችላል ፡ ፡<br>ለህክምና ውክፍያ ሊያስፈልግዎ ይችላል ፡ ፡ |
| - ችግሩን ለመፍታት ምን አሚራጮች እንዳሉ ከምርምር ቡድኖቹ ምክር ያግኙ           | በተሚራሚራ በየጊዜው ለክትትል አይደለም በዎችም እንዲሁም ጉዳዩን በራሳቸው ማንኛውም ደረጃ ይወጡታል ፡ ፡<br>ጉዳቱ ከተሚራሚራ ውተክ ታታይ ምክር አያገኝም ፡ ፡                                                                                 |

ከጥናቱ ጋር የተዛመደ ሚጃ

በሥነ ምግባር ስርዓት ለማረጋገጥ (ኤል.ኤፍ.ኤ) እና በፖሊሲ ላይ የተገኙ ሰዎች አብዛኛዎቹ የአካል ጉዳቶች፣ በተለይም ሁለተኛ ደረጃ እንደ ቁስሎች፣ እብጠቶች እና ማርሰሞች ያሉት በአብዛኛው ልንክላክላቸው የምንችላቸውናቸው፡ ብዙ የሕክምና አቅርቦቶች ሳያስፈልጋቸው በቤት ውስጥ ሊተገበሩ የሚችሉ የአካል ጉዳቶችን በራስ-የሚከታተሉ የሥነ ምግባር ተቀላቃሪዎች አሉ፡፡ ብዙውን ጊዜ ግን እነዚህ ዘዴዎች ከነርቭ ጋር የተያያዙ የአካል ጉዳት ወይም በሰውነት ታችን የወሃ ማሳል ፈሳሽ ማስመር በሚታዩበት የሚፈጠር እብጠት ያለባቸው ታካሚዎች አልተማሩም ወይም ቢማሩም ያለማቋረጥ አይተገበሩም፡፡ ነገር ግን በተቃራኒው በሽታዎች የተጠቁ ሰዎች የአካል ጉዳትን ነገር የተዘመዱ ከብዙ ችግሮች ያጋጥሟቸዋል እንደ ማለል፣ የእንቅስቃሴ ማደብ፣ በኢኮኖሚ ጉድለት እና የማሳሰላት ናቸው፡፡ ይህ በተጎዱ ሰዎች የአእምሮ ጤንነት ላይ አሉታዊ ተጽዕኖ ያሳድራል፡፡ በእርግጥ በህመሙ የተጎዱ ሰዎች ብቻ ሳይሆኑ የአካል ጉዳትን በሚከታተሉ ተፅዕኖ ለሌሎች አባላትም ጭምር ነው፡፡

ሪፖርት የተደረጉት ብዙ ችግሮች ከማለል እና የገንዘብ እጥረት ጋር የሚዘመዱ ሆነው አግኝተናል፡፡ ማህበራዊ እና ኢኮኖሚያዊ ጉዳታችንን የሚጎሳ ለቤተሰብ ላይ የተሰነዘረቱ አቀራረቦች የግለሰቦችን እና የቤተሰብን የኑሮ ደረጃ ሊያሻሽሉ ይችላሉ፡፡ አካሄዱ የሚያተኩረው ከሽግግር ሰብአዊ ምስጋናዎች ባሻገር ነው፡፡ በበሽታው በተጠቁ ሰዎች፣ በቤተሰቦቻቸው እና በማህበረሰቡ አባላት ማከከል ስለ የሥነ ምግባር በሽታ፣ ኤል ኤፍ እና ፖሊሲ ላይ የሚገኙ ግንዛቤ ማስደግ፡፡ የአካል ጉዳት አያያዝና -የአካል ጉዳቶችን ማከላከል እና ራስን ማክም እና; የተጎዱ ሰዎችን እንዲሁም የቤተሰብ አባላትን ማህበራዊ-ኢኮኖሚያዊ አቅም ማሳደግ ስለተች፡፡

ሣጥን 3. በምርመራ/በሚደረገው ውጤት ገብነት የሚጠበቁ ሊሆኑ የሚችሉ አሉታዊ ውጤቶች በጠፍ ጥበቃ ሚኒስቴር በአለም የጠፍ ድርጅት እና ዓለም አቀፍ የፀረ-የሥነ ምግባር ፌዴሬሽን መመሪያ ላይ በመመርኮዝ ቁስሎች፣ ኮንትራቱ እና የሊምፍ ኢዲማ/እብጠት/ህመም አያያዝ ምንም የሚጠበቁ አሉታዊ ውጤቶች የሉም፡፡

የዚህ ጥናት ዓላማ የአካል ጉዳትን ለማከላከል እና በዘላቂነት ለመቆጣጠር የራስ-ህክምና በቤተሰብ ላይ የተሰነዘረቱ እና ያተኮሩ አቀራረቦችን ማግኘት በሚሞክሩ ሰዎች ላይ የኑሮ ጥራት ደረጃ፣ የአእምሮ ጤንነት እና የሥነ ምግባር ፖሊሲ ስለ እና የሊንፋቲክ ፊላሪያሲስ የተጎዱ ሰዎች እና የቤተሰባቸው ተሳታፊነት በምስራቅ እና ምስራቅ ጎጃም፣ ኢትዮጵያ፣ ከ2021-2023 ውጤታማነት ለመዳሰስ ነው፡፡

የአሁኑ ፕሮጀክት በቤተሰብ ላይ የተመሠረተ አቀራረብን ውጤታማነት ለማጥናት በዘፈቀደ ቁጥጥር የተደረገ በትዲዲንን ይጠቀማል፡፡ ምክንያቱም በችግሮች እና በውጤቶች (ቶች) ማከከል የምክንያት እና ውጤት ግንኙነት ማረጋገጥ አለመኖሩን ለመወቅ ይህ በጣም ጠንካራ ያለ ማንገድ ነው፡፡

ሣጥን 4. የጥናት ንድፍ ጥናቱ በዘፈቀደ ቁጥጥር የተደረገ በትዲዲን ጥናት ንድፍን ይጠቀማል፡፡

ጥናቱ በጠቅላላው ወደ ስምንት ወር ያህል ይወስዳል፡፡ በዚህ ጥናት ውስጥ ለማተፍ ከወሰኑ በባክስ 5. ላይ የሚታዩ ውንጊዜ ሰሌዳ እንዲከተሉ ይጠየቃሉ የጊዜ ሰሌዳን ለማክበር ይገኛል።

በሰጠን 6 ውስጥ በጥናቱ ውስጥ በሚተካ ወደፊት ሊታዩ የሚችሉ አደጋዎችን እና የሚጠበቁ ጥቅሞችን ጠቅለል አድርገናል፡፡

| ሣጥን 6. በጥናቱ ውስጥ በሚካተቱ የሚኖሩ ለጋዎች እና የሚጠበቁ ጥቅሞች |                                                                                                                                                                                                                                                                                                                                                                                                                                                                                                                                                    |
|-----------------------------------------------|----------------------------------------------------------------------------------------------------------------------------------------------------------------------------------------------------------------------------------------------------------------------------------------------------------------------------------------------------------------------------------------------------------------------------------------------------------------------------------------------------------------------------------------------------|
| ሊጠበቁ የሚችሉ አደጋዎች                               | የሚጠበቁ ጥቅሞች                                                                                                                                                                                                                                                                                                                                                                                                                                                                                                                                         |
| - ምንም ሊጠበቅ የሚችል አደጋ የለም                       | <p>ጥናቱ በታላላቅ ማሳሰቢያዎች ላይ የሚከተለው ጥቅም ይኖረዋል ብለን እንጠብቃለን ፡ ፡</p> <ul style="list-style-type: none"> <li>➢ የአካል ጉዳትን ለማሳሰብ እና ራስን በራስ ስለመመራት ልምዶች የተሻሻለ ዕውቀት እና ክህሎቶች; በቤተሰብ ውስጥ ዘላቂ የራስ አስተዳደር እና የአካል ጉዳትን ማሳሰብ (የአካል ጉዳት አስተዳደር) ፡ ፡</li> <li>➢ በእንቅስቃሴ ደረጃዎች እና በሚህበራዊ ተሳትፎ ማሻሻል ፡ አነስተኛ ቁስሎች እና ዝቅተኛ የእብጠት ደረጃ</li> <li>➢ የተሻሻለ የግለሰብ እና የቤተሰብ የሂወት ጥራት ደረጃ እና የአእምሮ ጠገን ፡ ፡</li> <li>➢ የሥጋ ደቆም ፣ የኤል.ኤፍ. ወይም ከፖዴኮኒ ዝስ ጋር የተያያዙ የአካል ጉዳተኞች ያሉበት የቤተሰብ አባል የተሻሻለ እንዲኖር የእውቀት እና አማካኝ ምዕባር (ማለል ማቅነስ) ፡ ፡</li> <li>➢ ሚህበራዊ-ኢኮኖሚያዊ ማገልገሎት.</li> </ul> |

በጥናቱ ወቅት የተወሰኑ ክስተቶች ሊከናወኑ ይችላሉ ፡ ፡ እነዚህን በሳጥን 7 ላይ ጠቅለል አድርገን እንሱን እንዴት ማስተዳደር እንደምንችል ገልፀናል ፡ ፡

| ሣጥን 7. በጥናቱ ወቅት ሊከሰቱ የሚችሉ ክስተቶች |                                                 |
|---------------------------------|-------------------------------------------------|
| የሚከሰቱ ክስተቶች                     | እንዴት ማስተካከል እንደሚችል                              |
| የበጎ ፈቃደኞች መውጣት/ ማሰራጨት ጥናቱ       | መጀመሪያ ላይ ይህን ከግምት በማስገባት የጠቅላላው ምኞት 15% ጨምሮ ፡ ፡ |
| 46                              |                                                 |

|                                                       |                                                                                                                                                                                          |
|-------------------------------------------------------|------------------------------------------------------------------------------------------------------------------------------------------------------------------------------------------|
| <p>የአዳዲስ ሚሮቻችን ተገኝነት በእርስዎ ውሳኔ ላይ ተጽዕኖ ሊያሳድር ይችላል</p> | <p>እኛ (ተሚራሚሮ ቡድኑ) በጉዳዩ ላይ ተወያይተን ሀሳቡን ለማሞላት ከተውሎ ስን ምግባር ኮሚቴ አካላችን በዚያ ላይ እንወስናለን ::</p>                                                                                                 |
| <p>[የሚቀረጡ መረጃዎች ተሳትፎ ፣ ድንገት ካለ]</p>                   | <ul style="list-style-type: none"> <li>➢ የተሚራ ጠውግለሰብ የሚረግለትን ክትትል ጣልቃ ሁለት ተከታይ ጉብኝቶች ካቋረጠ ::</li> <li>➢ የጥናቱ ተሳታፊ በጥናቱ ለመቀጠል ፍላጎት ከሌለው ::</li> <li>➢ የሚረግብ በታችውን መላውጥ ከፈለገ ::</li> </ul> |

• በጥናቱ መጨረሻ የአካል ጉዳትን ለመከላከል እና ራስን በራስ ስለመከታተል ልምዶች ዕውቀቶችን እና ክህሎቶችን ያሻሽላሉ ፤ በቤተሰብ ውስጥ ዘላቂ የራስ አስተዳደር እና የአካል ጉዳትን መከላከል (የአካል ጉዳት መከላከያ) ፡ ፡ በእንቅስቃሴ ደረጃዎች እና በመሥሪያ ቤቅ ተሳትፎ መሻሻል ፣ አነስተኛ ቁስሎች እና ዝቅተኛ የሊምፍዴማ/እብጠት/ ደረጃ ማድረስ። የተሻሻለ የግለሰብ እና የቤተሰብ የህይወት ጥራት ደረጃ እና የአእምሮ ጤና ፡ ፡ የተሻሻለ ዕውቀት እና አመለካከቶች (መላ ለልን መቀነስ) የሥራ ደዋ ፣ የኤል.ኤፍ. ወይም ከፖዲኒ ዝስ ጋር የተዘመደ የአካል ጉዳት ላለበት የቤተሰብ አባል እንዲኖር ማድረግ ፡ ፡ በተጨማሪም የጥናቱን ተሳታፊዎች ማህበራዊና ኢኮኖሚያዊ አቅም ልበት ይኖራል ፡ ፡ በመጨረሻም በስነ-ጽሁፍ ግምገማ ማላይ በመመዘኑ በፕሮጀክቱ የሚረግብ ወራቶች ውስጥ የሚደረገው የስነ-ልቦና እንክብካቤ ክፍል በተጨማሪ (= ተሳትፎን መሻሻል ፣ የሕይወት ጥራት ደረጃ እና የአእምሮ ጤና ጉዳት) ይካተታል ፡ ፡

ከጥናቱ የተሰበሰቡ ሚሮቻችን በሙሉ በሙከራ ይቀመጣሉ ፡ ፡ የፕሮጀክቱ ሚሮ (ሚሮ አመለካከት) እና የዚህ ጥናት ዋና ሚሮ ማረጋገጫን የሚረግብ መሻሻል እና ደህንነት ለሚረጋገጥ ጥሙላ ሃላፊነትን ይወስዳሉ ፡ ፡ የጥናቶቹ ውጤቶች አቀራረብ በስብሰባዎች / ስብሰባዎች ላይ ወይም በሳይንሳዊ መጽሐፍት ውስጥ መታተፍ ውስጥም አያካትቱም ፡ ፡ ሆኖም ለሚረግብ አጠቃቀም እና ቁጥጥር ፣ ለሥነ ምግባር ኮሚቴዎች እና ለስፖንሰር ተወካዮች ብሔራዊ ባለሥልጣን ለማጠራት ሚሮዎችን ያገኛል ፡ ፡

የጥናቱ ተከፋይ እንደሚሆን ለእርስዎ ምንም ክፍያ አይሰጥም ፣ ገንዘብ አስፈላጊ የሆኑ የንፅህና መጠበቂያ ቁሳቁሶች እና ሌሎች በቀጥታም ሆነ በተዘዋዋሪ የአካል ጉዳት መከላከያ ስራዎችን (የታይል ቆጣቢ ምድጃዎችን) ሌሎች አስፈላጊ ዓይነቶችን ይሰጥታል ፡ ፡ በጥናቱ ውስጥ በቀጥታ በመሳተፍ የሚመዘኑ ማንኛውም ጉዳት ወይም ህመም ሊኖር በሕጋዊው ደንብ ይስተናገዳል ፡ ፡

ከጥናቱ ጋር የሚዘመዱ ማንኛውም ጥያቄዎች ካሉዎት ወይም በጥናቱ ውስጥ ከመሳተፍዎ በፊት / ወቅት ማንኛውንም መጠኑ ክስተት ካጋጠመዎት በሰጥን 8 ውስጥ የተዘረዘሩትን የእውቂያ ሰዎች ማምክር ይችላሉ ፡ ፡

ከጥናቱ ጋር የሚዘመዱ ማንኛውም ጥያቄዎች ካሉዎት ወይም በጥናቱ ውስጥ ከመሳተፍዎ በፊት / ወቅት ማንኛውንም መጠኑ ክስተት ካጋጠመዎት በስክስ 8 ውስጥ የተዘረዘሩትን ሰዎች ማምክር ይችላሉ ፡ ፡

ሣጥን 8. የግንኙነት ሰዎች

1. ሞገስ ወቤ  
ስልክ +251912076152 ኢሜል mogeswub@gmail.com
2. ተስፋዬ ታደሰ (የኢትዮጵያ ብሔራዊ በሥራ ደዋ በሽታ የተጠቁት ሰዎች ማህበር (ኢናፖል)) ፡ ፡

47

ስልክ +251911440367 ኢሜል [tadesse.tesfaye@gmail.com](mailto:tadesse.tesfaye@gmail.com)

ከመብቶቻዎ ጋር የተያያዙ ማናቸውም ጥያቄዎች ካሉዎት [የስነ ምግባር ኮሚቴውስም እና የእውቂያ ቁጥር] ማግኘት ይችላሉ፡፡

የገንዘብ ድጋፍ አድራጊ ወሀት መቅን በተመሳሳተ ምንም ተሳትፎ ወይም ወሳኔ አይኖረዎትም፡፡

|                                                                                                                                                                                                                                                                            |                                                                                                                                                                                    |
|----------------------------------------------------------------------------------------------------------------------------------------------------------------------------------------------------------------------------------------------------------------------------|------------------------------------------------------------------------------------------------------------------------------------------------------------------------------------|
| <p><u>ስምዎን ትሚገባል</u></p> <p>ከላይ የተጠቀሱትን ሚጃዎች አንብቤ አለሁ ወይም እኔ የማይሆን ወሰድ አንብብ ልኛል፡፡ ጥያቄዎችን የሚጠየቅ እድል አለኝ እና ምላሁም ጥያቄዬ ፍላጎቴ ማልስ እስኪያረካኝ ድረስ አግኝቻለሁ፡፡ በዚህ የምርምር ጥናት ውስጥ በፈቃደኝነት ለመሳተፍ እፈቅዳለሁ፡፡</p> <p>_____</p> <p>የተሳታፊውስም</p> <p>_____</p> <p>የተሳታፊው ፊርማ</p> <p>ቀን _____</p> | <p>ተሳታፊውስ ለ ጥናቱ ጥያቄዎችን የሚጠየቅ እድል እንደተሰጠ እና ሁሉም ጥያቄዎች በትክክል እንደተመለሱ አረጋግጣለሁ፡፡ ስምዎን ተ በፈቃደኝነት ማሳጠቱን አረጋግጣለሁ፡፡</p> <p>_____</p> <p>ፈቃዱን የሚያስደውሰው ፊርማ</p> <p>_____</p> <p>ቀን _____</p> |
|----------------------------------------------------------------------------------------------------------------------------------------------------------------------------------------------------------------------------------------------------------------------------|------------------------------------------------------------------------------------------------------------------------------------------------------------------------------------|

**የቤተሰብ የኑሮ ሁኔታ (Family Quality of Life)**

| ተ. | የእርካታ/ደስተኛነት ደረጃዎ ከሚከተሉት ጥቦች አኳያ ሲታይ | በጣም አልስማማም | አልስማም | ሀሳብ የለኝም | እስማማለሁ | በጣም እስማማለሁ |
|----|--------------------------------------|------------|-------|----------|--------|------------|
| 1  | ቤተሰቦች በጋራ በሚከፈሉት ጊዜ ደስተኛ ናቸው         |            |       |          |        |            |
| 2  | የቤተሰቡ አባላት ልጆች እራሳቸውን እንዲችሉ ያግዛሉ     |            |       |          |        |            |
| 3  | ቤተሰቡን ከጭቀት የሚያድን ድጋፍ አለው             |            |       |          |        |            |
| 4  | ለቤተሰቡ አባላት ድጋፍ የሚያደርጉ ጎረቤት/ዳደሮች አሉ   |            |       |          |        |            |
| 5  | የቤተሰቡ አባላት ልጆች ትምህርታቸውን እንዲማኑና በሌሎች  |            |       |          |        |            |

|    | ስራዎች እንዲሰተፉ ያደርጋሉ                                               |  |  |  |  |  |
|----|-----------------------------------------------------------------|--|--|--|--|--|
| 6  | የቤተሰቡ አባላት ወደ ሚዲያ ጉብኝት በታላላቅ ምድቶች ስጋር ችግር የለም                   |  |  |  |  |  |
| 7  | የቤተሰቡ አባላት በሚኖሩት ገር ላይ በግልፅ ይወያያሉ                               |  |  |  |  |  |
| 8  | የቤተሰቡ አባላት ልጆችን ከሌላ ሰዎች ጋር እንዲያይዩ እንደሚችሉ ያስተምራሉ                 |  |  |  |  |  |
| 9  | የቤተሰቡ አባላት የቤተሰቡ ፍላጎት ለማሟላት ጊዜ ይሰጣሉ                             |  |  |  |  |  |
| 10 | የቤተሰቡ አባላት የሚያገጥሙትን ችግር በጋራ ይፈታሉ                                |  |  |  |  |  |
| 11 | የቤተሰቡ አባላት በሙሉ በገር ኑሯቸውን ያሸንፋሉ                                  |  |  |  |  |  |
| 12 | የቤተሰቡ አባላት በፍቅርና በሚደግፉት ይኖራሉ                                    |  |  |  |  |  |
| 13 | ቤተሰቡን በሙሉ በችግር ጊዜ የሚያግዝ ሌላ አካል/ሰው አለ                            |  |  |  |  |  |
| 14 | በቤተሰቡ ውስጥ ህፃናት የራሳቸውን ጥሩ ውሳኔ እንዲወስኑ ይረዳሉ                        |  |  |  |  |  |
| 15 | ቤተሰቡ የሚያስፈልጋቸውን ህክምና ያገኛሉ                                       |  |  |  |  |  |
| 16 | ቤተሰቡ ለወጭ አይቸገርም                                                 |  |  |  |  |  |
| 17 | በቤተሰቡ ውስጥ ያሉ አዋቂዎች የህፃናትን ህይወት እንደጓደኛ ሁኔታ ይደረግላሉ                |  |  |  |  |  |
| 18 | ቤተሰቡ የህይወትን ውጣውረድ ማቋቋም ይችላሉ                                     |  |  |  |  |  |
| 19 | በቤተሰቡ ውስጥ ያሉ አዋቂዎች የእያንዳንዱን ህፃናት ፍላጎት ለማሟላት ይሰራሉ                |  |  |  |  |  |
| 20 | ቤተሰቡ የጥርስ ህክምና ሲያስፈልግ ማግኘት ይችላል                                 |  |  |  |  |  |
| 21 | ቤተሰቡ በስራ ጉዳይ፣ በት/ቤትምህን በጎረቤት ምኞት/ደህንነት ይሰማቸዋል                   |  |  |  |  |  |
| 22 | የአካል ጉዳት ያለበት የቤተሰቡ አባል በስራ ጉዳይም በት/ቤት አላማውን ለማስከት ተገቢ ድጋፍ ያገኛል |  |  |  |  |  |

|    |                                                         |  |  |  |  |  |
|----|---------------------------------------------------------|--|--|--|--|--|
| 23 | የአካል ጉዳት ያለበት የቤተሰብ አባል በቤት ውስጥ አላማውን ለማከት ተገቢ ድጋፍ ያገኛል |  |  |  |  |  |
| 24 | የአካል ጉዳት ያለበት የቤተሰብ አባል ጓደኛ እንዲኖረው ድጋፍ ያገኛል             |  |  |  |  |  |
| 25 | የቤተሰብ አባላት ከማኛ ወምአገልግሎት ሰጪ አካላት ጋር ጥሩ ግንኙነት አላቸው        |  |  |  |  |  |

ለሰጠኝ ቃለ መጠይቅ አማካኝ ለሁ!

**የ ማለል ዳሰሳና ማቅነስ (the stigma assessment and reduction of impact –SARI scale)**

| ተ. ቁ      | ዝርዝር                                          | ምላሽ                | በአብዛኛው | አልፎ አልፎ | አንዳንድ ደዓ/አንድ ጊዜ | አለውቅም |
|-----------|-----------------------------------------------|--------------------|--------|---------|-----------------|-------|
|           | በግለሰቡ ላይ የደረሰ ማለል                             |                    | 4      | 3       | 2               | 1     |
| የ ገጠሙ ማለል |                                               |                    |        |         |                 |       |
| 1U        | የስጋ ደዌ በሽታ/የዝሆኔ ተጠቂ በሚሆን ዎሰዎች ርቀዎታል           | 1 አዎ 2 የለም 3 አለውቅም |        |         |                 |       |
| ለ         | ምላሽዎ አዎ ከሆነ ምን ያህል ያጋጥሟል                      |                    |        |         |                 |       |
| 2U        | በጣም የሚቆርቡት ሰው የስጋ ደዌ በሽታ/የዝሆኔ ተጠቂ በሚሆን ርቆዎታል  | 1 አዎ 2 የለም 3 አለውቅም |        |         |                 |       |
| ለ         | ምን ያህል ነው                                     |                    |        |         |                 |       |
| 3U        | የስጋ ደዌ በሽታ/የዝሆኔ እንዳለብዎት ለሰዎች በሚገርዝዝ ዳደኛ አጠቃል  | 1 አዎ 2 የለም 3 አለውቅም |        |         |                 |       |
| ለ         | ምን ያህል ነው                                     |                    |        |         |                 |       |
| 4U        | የስጋ ደዌ በሽታ/የዝሆኔ ተጠቂ በሚሆን ዎሰዎች አይነኩዎትም         | 1 አዎ 2 የለም 3 አለውቅም |        |         |                 |       |
| ለ         | ምን ያህል ነው                                     |                    |        |         |                 |       |
| 5U        | የስጋ ደዌ በሽታ/የዝሆኔ ተጠቂ በሚሆን ዎሰዎች በአካል ይርቃሉ       | 1 አዎ 2 የለም 3 አለውቅም |        |         |                 |       |
| ለ         | ምን ያህል ነው                                     |                    |        |         |                 |       |
| 6U        | ሰዎች የስጋ ደዌ በሽታ/የዝሆኔ ተጠቂ ሚሆን ዎን ሲያውቁ ማረፊያ ይሰጣሉ | 1 አዎ 2 የለም 3 አለውቅም |        |         |                 |       |
| ለ         | ምን ያህል ነው                                     |                    |        |         |                 |       |
| 7U        | ከሚሰበረሰቡ የ ማለል ስሜት ይሰማዎታል                      | 1 አዎ 2 የለም 3 አለውቅም |        |         |                 |       |
| ለ         | ምን ያህል ነው                                     |                    |        |         |                 |       |

|              |                                                         |                    |  |  |  |
|--------------|---------------------------------------------------------|--------------------|--|--|--|
| ራስን ማለፅ      |                                                         |                    |  |  |  |
| 8U           | ሰዎች የስጋ ደዌ በሽታ/የዝሆኔ ተጠቂ ማሆን ዎን እንዳያውቁ ይጠነ ቀቃሉ           | 1 አዎ 2 የለም 3 አላውቅም |  |  |  |
| ለ            | ምን ያህል ነው                                               |                    |  |  |  |
| 9U           | የስጋ ደዌ በሽታ/የዝሆኔ ተጠቂ ማሆን ዎን ማደበቅ ያስፈልጋል ብለው ያምናሉ         | 1 አዎ 2 የለም 3 አላውቅም |  |  |  |
| ለ            | ምን ያህል ነው                                               |                    |  |  |  |
| 10U          | የስጋ ደዌ በሽታ/የዝሆኔ ተጠቂ ማሆን ዎን ለሌላ ሰው ማናገር አደጋ አለው ብለው ያምናሉ | 1 አዎ 2 የለም 3 አላውቅም |  |  |  |
| ለ            | ምን ያህል ነው                                               |                    |  |  |  |
| 11U          | ሰዎች የስጋ ደዌ በሽታ/የዝሆኔ አለበት ይሉኛል ብለው ይጨቃሉ                  | 1 አዎ 2 የለም 3 አላውቅም |  |  |  |
| ውስጥ የማለል ስሜት |                                                         |                    |  |  |  |
| ለ            | ምን ያህል ነው                                               |                    |  |  |  |
| 12U          | የስጋ ደዌ በሽታ/የዝሆኔ በማሆን ዎ ጥፋተኛነት ይሰማታል                     | 1 አዎ 2 የለም 3 አላውቅም |  |  |  |
| ለ            | ምን ያህል ነው                                               |                    |  |  |  |
| 13U          | የስጋ ደዌ በሽታ/የዝሆኔ ስለአለብዎ ከሌሎች ሰዎች አንሳላሁ ብለው ያስባሉ          | 1 አዎ 2 የለም 3 አላውቅም |  |  |  |
| ለ            | ምን ያህል ነው                                               |                    |  |  |  |
| 14U          | የስጋ ደዌ በሽታ/የዝሆኔ ስለአለብዎ ሀፍረት ይሰማታል                       | 1 አዎ 2 የለም 3 አላውቅም |  |  |  |
| ለ            | ምን ያህል ነው                                               |                    |  |  |  |
| 15U          | የስጋ ደዌ በሽታ/የዝሆኔ ስለአለብዎ ንፁህ አይደለሁም ብለው ያስባሉ              | 1 አዎ 2 የለም 3 አላውቅም |  |  |  |
| ለ            | ምን ያህል ነው                                               |                    |  |  |  |
| 16U          | የስጋ ደዌ በሽታ/የዝሆኔ እንዳለብዎ ለሰዎች በማናገር ዎ የቆጫ                 | 1 አዎ 2 የለም 3 አላውቅም |  |  |  |
| ለ            | ምን ያህል ነው                                               |                    |  |  |  |
| 17U          | የስጋ ደዌ በሽታ/የዝሆኔ ስለአለብዎ ማጥፎ ሰው ነኝ ብለው ያስባሉ               | 1 አዎ 2 የለም 3 አላውቅም |  |  |  |
| ለ            | ምን ያህል ነው                                               |                    |  |  |  |
| በጥርጣሬ ማለል    |                                                         |                    |  |  |  |
| 18U          | የስጋ ደዌ በሽታ/የዝሆኔ ያለባቸው ሰዎች በአስረዎቻቸው ከስራ ሊባረሩ ይችላሉ        | 1 አዎ 2 የለም 3 አላውቅም |  |  |  |
| ለ            | ምን ያህል ነው                                               |                    |  |  |  |
| 19U          | የስጋ ደዌ በሽታ/የዝሆኔ ያለባቸው ሰዎች በማህበረሰቡ ዘንድ የህዝብ ሽክምና ቸውብለው   | 1 አዎ 2 የለም 3 አላውቅም |  |  |  |

|    |                             |              |  |  |  |  |
|----|-----------------------------|--------------|--|--|--|--|
|    | ያምና ሉ                       |              |  |  |  |  |
| ለ  | ምን ያህል ነው                   |              |  |  |  |  |
| 20 | ሰዎች የስጋ ደቆ በሽታ/የዝሆኔ ያለባቸውን  | 1 አዎ 2 የለም 3 |  |  |  |  |
| U  | አስጠይታና ቸውብለውያስባሉ            | አላውቅም        |  |  |  |  |
| ለ  | ምን ያህል ነው                   |              |  |  |  |  |
| 21 | ሰዎች የስጋ ደቆ በሽታ/የዝሆኔ ካለባቸውጋር | 1 አዎ 2 የለም 3 |  |  |  |  |
| U  | ለሙረ ምች አይሰማቸውም              | አላውቅም        |  |  |  |  |
| ለ  | ምን ያህል ነው                   |              |  |  |  |  |

### አማካኝና ሁኔታ

| የጥያቄ ቁጥር | ተገቢው ጥያቄ ማረጋገጫ<br>አድራሻ አስተያየት ለጋራ ማጠቃለያ                                                           | አጠቃላይ የሆኑ ጥያቄዎች | ዕድሜ | የጥያቄ አድራሻ | የጥያቄ ዓይነት | የጥያቄ ማረጋገጫ |   |
|----------|---------------------------------------------------------------------------------------------------|-----------------|-----|-----------|-----------|------------|------------|------------|------------|------------|------------|---|
| 1        | ሁሉንም ጥያቄዎች ለጋራ ማጠቃለያ ለማድረግ አስፈላጊ ነው።<br>(አጠቃላይ ጥያቄዎች ለማረጋገጥ የሚያስፈልጉትን ጥያቄዎች ይጠቅሙ)                 |                 | 0   |           |           |            |            |            | 1          | 2          | 3          | 5 |
| 2        | አንድ ደረጃ ለጥያቄዎች ማረጋገጫ የሚያስፈልግ ሆኖ ለጋራ ማጠቃለያ ማድረግ ይቻላል።<br>(አጠቃላይ ጥያቄዎች ለማረጋገጥ የሚያስፈልጉትን ጥያቄዎች ይጠቅሙ) |                 | 0   |           |           |            |            |            | 1          | 2          | 3          | 5 |
| 3        | አንድ ደረጃ ለጥያቄዎች ማረጋገጫ ለጋራ ማጠቃለያ ማድረግ ይቻላል።<br>(አጠቃላይ ጥያቄዎች ለማረጋገጥ የሚያስፈልጉትን ጥያቄዎች ይጠቅሙ)            |                 | 0   |           |           |            |            |            | 1          | 2          | 3          | 5 |
| 4        | አጠቃላይ ጥያቄዎች ለጋራ ማጠቃለያ ማድረግ ይቻላል።<br>(አጠቃላይ ጥያቄዎች ለማረጋገጥ የሚያስፈልጉትን ጥያቄዎች ይጠቅሙ)                     |                 | 0   |           |           |            |            |            | 1          | 2          | 3          | 5 |
| 5        | አጠቃላይ ጥያቄዎች ለጋራ ማጠቃለያ ማድረግ ይቻላል።<br>(አጠቃላይ ጥያቄዎች ለማረጋገጥ የሚያስፈልጉትን ጥያቄዎች ይጠቅሙ)                     |                 | 0   |           |           |            |            |            | 1          | 2          | 3          | 5 |
| 6        | አጠቃላይ ጥያቄዎች ለጋራ ማጠቃለያ ማድረግ ይቻላል።<br>(አጠቃላይ ጥያቄዎች ለማረጋገጥ የሚያስፈልጉትን ጥያቄዎች ይጠቅሙ)                     |                 | 0   |           |           |            |            |            | 1          | 2          | 3          | 5 |
| 7        | አንድ ደረጃ ለጥያቄዎች ማረጋገጫ ለጋራ ማጠቃለያ ማድረግ ይቻላል።<br>(አጠቃላይ ጥያቄዎች ለማረጋገጥ የሚያስፈልጉትን ጥያቄዎች ይጠቅሙ)            |                 | 0   |           |           |            |            |            | 1          | 2          | 3          | 5 |
| 8        | አጠቃላይ ጥያቄዎች ለጋራ ማጠቃለያ ማድረግ ይቻላል።<br>(አጠቃላይ ጥያቄዎች ለማረጋገጥ የሚያስፈልጉትን ጥያቄዎች ይጠቅሙ)                     |                 | 0   |           |           |            |            |            | 1          | 2          | 3          | 5 |
| 9        | አጠቃላይ ጥያቄዎች ለጋራ ማጠቃለያ ማድረግ ይቻላል።<br>(አጠቃላይ ጥያቄዎች ለማረጋገጥ የሚያስፈልጉትን ጥያቄዎች ይጠቅሙ)                     |                 | 0   |           |           |            |            |            | 1          | 2          | 3          | 5 |
| 10       | አንድ ደረጃ ለጥያቄዎች ማረጋገጫ ለጋራ ማጠቃለያ ማድረግ ይቻላል።<br>(አጠቃላይ ጥያቄዎች ለማረጋገጥ የሚያስፈልጉትን ጥያቄዎች ይጠቅሙ)            |                 | 0   |           |           |            |            |            | 1          | 2          | 3          | 5 |
| 11       | አጠቃላይ ጥያቄዎች ለጋራ ማጠቃለያ ማድረግ ይቻላል።<br>(አጠቃላይ ጥያቄዎች ለማረጋገጥ የሚያስፈልጉትን ጥያቄዎች ይጠቅሙ)                     |                 | 0   |           |           |            |            |            | 1          | 2          | 3          | 5 |



የህመምተኛ ጤና ጥያቄዎች-9(PHQ-9)

ባለፉት ሁለት ምንታት ውስጥ ምን ያህል ጊዜ በሚከተሉት ችግሮች ተችግረሃል፡፡ የ “✓” ምልክት ለሚያሳይህት ተጠቀም

| ተ. ቁ | ጥያቄ                                                                                                                            | በጭራሽ | ብዙ ቀናት | ከግማሽ ቀናት በላይ | በየቀኑ ማለት ይቻላል |
|------|--------------------------------------------------------------------------------------------------------------------------------|------|--------|--------------|---------------|
| 1    | ትንሽ ፍላጎት ወይም ደስታ ነገሮችን ለማድረግ አለ                                                                                                | 0    | 1      | 2            | 3             |
| 2    | የተስፋ ማቅረብ ጥሰታ፣ የሚፈስ ጭቀት ወይም ተስፋ ማቅረብ አለ                                                                                        | 0    | 1      | 2            | 3             |
| 3    | ሚደቅ ወይም ማሳደግ፣ ወይም ከሚጠን በላይ ማሳደግ ችግር አለ                                                                                         | 0    | 1      | 2            | 3             |
| 4    | የድካም ስሜት ወይም አንስተኛ ኃይል አለው                                                                                                     | 0    | 1      | 2            | 3             |
| 5    | ይካማ የምትጠቀሙት ፍላጎት ወይም ከሚጠን በላይ ማባለት አለ                                                                                          | 0    | 1      | 2            | 3             |
| 6    | ሚጠይቁ ስሜት ስለራስዎ ተሰምቶታት - ወይም እርስዎ ውድቀት እንደሆኑ ወይም ራስዎን ወይም ሌሎችን ለፍርስዎል                                                           | 0    | 1      | 2            | 3             |
| 7    | በነገሮች ላይ የሚተኮር ችግር አለ ማለትም ጋዜጣ ወይም ቴሌቪዥን ማመልከት ችግር አለ                                                                          | 0    | 1      | 2            | 3             |
| 8    | ሌሎች ሰዎች ሊያስተውሉት በሚችሉት ሁኔታ አለ በዝግታ ማቀሳቀስ ወይም ማግኘት አለ? ወይም በተቃራኒው በጣም ታማኝነት የሳይሉት ወይም እረፍት የሌለው በሚሆኑ ክፍተቶች በበለጠ ብዙ እየተንቀሳቀሱት ወይ? | 0    | 1      | 2            | 3             |
| 9    | ሚጠይቁ የተሻለ ነው ብለው ያወቃሉ ወይም ራስዎን በሆነ ማንኛውም ማዘድ የተሻለ ነው ወይላሉ?                                                                     | 0    | 1      | 2            | 3             |

ለቢሮ ከድድ 0 + \_\_\_\_\_ + \_\_\_\_\_ + \_\_\_\_\_

= ጠቅላላ ድምር \_\_\_\_\_ ማንኛውንም ችግር ካረጋገጡ ሥራዎችን ለማሥራት፣ በቤት ውስጥ ነገሮችን ለማከባከብ ወይም ሌሎች ሰዎች ጋር ለመገናኛት እና ዚህ ችግር ምን ያህል ከባድ አድርገውታል? በጭራሽ አስቸጋሪ አይደለም በተወሰነ ደረጃ ከባድ ነው በጣም ከባድ ነው እጅግ በጣም ከባድ
